# Supplementary material for: PhI(OAc)2-promoted metal-free oxidation of 2-oxoaldehydes: a facile one-pot synthesis of cyanoformamides
Source: Royal Society of Chemistry journal article supplement (doi:10.1039/c5ra14409d), 2015-01-01

## Supplementary Information

### **PhI(OAc)<sub>2</sub>-promoted metal-free oxidation of 2-oxoaldehydes: A facile one-pot synthesis of cyanoforamides**

Zhen Zhan, Xu Cheng, Yang Zheng, Xiaojun Ma, Xiaoyu Wang, Li Hai\* and Yong Wu\*

*Key Laboratory of Drug-Targeting of Education Ministry and Department of Medicinal Chemistry,*

*West China School of Pharmacy, Sichuan University, Chengdu, 610041, P. R. of China.*

*E-mail: wyong@scu.edu.cn*

### Contents

|                                                                                                                                                        |            |
|--------------------------------------------------------------------------------------------------------------------------------------------------------|------------|
| <b>(A) General Details.....</b>                                                                                                                        | <b>S2</b>  |
| <b>(B) Experimental Procedure and Analytical Data of Products.....</b>                                                                                 | <b>S2</b>  |
| <b>1. General reaction procedure for the indosobenzene diacetate-promoted<br/>    mental free synthesis of cyanoforamides from 2-oxoaldehydes.....</b> | <b>S2</b>  |
| <b>2. General reaction procedure for the synthesis of 2z from 2n.....</b>                                                                              | <b>S2</b>  |
| <b>3. Spectroscopic characterization data of products.....</b>                                                                                         | <b>S2</b>  |
| <b>(C) References.....</b>                                                                                                                             | <b>S12</b> |
| <b>(D) <sup>1</sup>H NMR and <sup>13</sup>C NMR Spectra of Products.....</b>                                                                           | <b>S13</b> |

## (A) General Details

All the direct oxidative reactions of aldehydes were carried out under sealed tube.  $^1\text{H}$  and  $^{13}\text{C}$  NMR spectra were recorded with tetramethylsilane as the internal standard. TLC was performed on glass-backed silica plates. Column chromatography was performed using silica gel (200-300 mesh) eluting with EtOAc/petroleum ether).  $^1\text{H}$  NMR spectra were recorded at 400 or 600 MHz (Varian) and  $^{13}\text{C}$  NMR spectra were recorded at 150 MHz (Varian). Chemical shifts are reported in ppm downfield from  $\text{CDCl}_3$  ( $\delta = 7.26$  ppm) for  $^1\text{H}$  NMR and relative to the central  $\text{CDCl}_3$  resonance ( $\delta = 77.0$  ppm) for  $^{13}\text{C}$  NMR spectroscopy. Coupling constants are given in Hz. All the 2-oxoaldehydes **1** were prepared according to the reported procedures.<sup>1</sup> General chemicals were purchased from commercial suppliers and used without further purification.

## (B) Experimental Procedure and Analytical Data of Products

### 1. General reaction procedure for the indosobenzene diacetate-promoted metal free synthesis of cyanoforamides from 2-oxoaldehydes

A 5 mL sealed tube was charged with  $\text{NH}_4\text{OAc}$  (3.0 mmol) and 2.0 mL of  $\text{CH}_3\text{CN}/\text{H}_2\text{O}$  (v:v = 4:1). The mixture was stirred at room temperature until the solid was completely dissolved. Then 2-oxoaldehyde (1.0 mmol) was added. After stirring for 5 min,  $\text{PhI}(\text{OAc})_2$  (2.0 mmol) was added. The reaction was carried out at room temperature in a sealed tube for 3h. The mixture was diluted with ethyl acetate, washed with water and brine. The combined organic phase was dried over anhydrous  $\text{Na}_2\text{SO}_4$ . Removal of the organic solvent in a vacuum followed by flash silica gel column chromatographic purification (petroleum/ethyl acetate) afforded the corresponding product.

### 2. General reaction procedure for the synthesis of **2z** from **2n**

Compound **2n** (533 mg, 2.0 mmol) was dissolved in TFA (3.0 mL) under an atmosphere of nitrogen and anisole (0.44 mL, 4.0 mmol) was added. The reaction was carried out at 60 °C for 12 hours. After the reaction was complete (TLC), the mixture was diluted with ethyl acetate, washed with brine and triethylamine (1.5 mL). The combined organic phase was dried over anhydrous  $\text{Na}_2\text{SO}_4$ . Removal of the organic solvent in a vacuum followed by flash silica gel column chromatographic purification (petroleum/ethyl acetate) afforded the product **2z**.

### 3. Spectroscopic characterization data of products

**Methyl(phenyl)carbamoyl cyanide (2a)**<sup>[2]</sup>

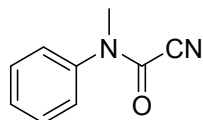

**2a**

White solid, mp. 60-62 °C (Lit<sup>2</sup> 61-63 °C); <sup>1</sup>H NMR (CDCl<sub>3</sub>, 400 MHz): δ 7.53-7.48 (m, 3H), 7.33-7.26 (m, 2H), 3.37 (s, 3H); <sup>13</sup>C NMR (CDCl<sub>3</sub>, 150 MHz): δ 144.5, 139.8, 130.1, 129.7, 126.9, 110.6, 36.7. ESI HRMS: calcd. for C<sub>9</sub>H<sub>8</sub>N<sub>2</sub>O+Na<sup>+</sup> 183.1652, found 183.1653. Elemental Analysis: C, 67.49; H, 5.03; N, 17.49, found C, 67.54; H, 5.01; N, 17.45. IR (KBr, cm<sup>-1</sup>): 3064, 2935, 2232, 1682, 1590, 1488, 1390, 996, 702.

### Methyl(o-tolyl)carbamoyl cyanide (2b)

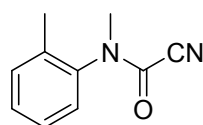

**2b**

Yellow solid, mp. 70-74 °C; <sup>1</sup>H NMR (CDCl<sub>3</sub>, 600 MHz): δ 7.40 (t, *J* = 7.2 Hz, 1H), 7.36 (d, *J* = 7.2 Hz, 1H), 7.33 (t, *J* = 7.2 Hz, 1H), 7.22 (d, *J* = 7.2 Hz, 1H), 3.39 (s, 3H), 2.31 (s, 3H); <sup>13</sup>C NMR (CDCl<sub>3</sub>, 150 MHz): δ 145.1, 138.5, 136.0, 131.9, 130.3, 128.3, 127.8, 110.5, 35.8, 17.2. ESI HRMS: calcd. for C<sub>10</sub>H<sub>10</sub>N<sub>2</sub>O+Na<sup>+</sup> 197.0685, found 197.0687. Elemental Analysis: C, 68.95; H, 5.79; N, 16.08, found C, 69.02; H, 5.87; N, 15.92. IR (KBr, cm<sup>-1</sup>): 3066, 2937, 2233, 1679, 1590, 1486, 1394, 1015, 699.

### Methyl(m-tolyl)carbamoyl cyanide (2c)

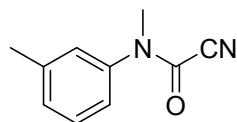

**2c**

Yellow liquid; <sup>1</sup>H NMR (CDCl<sub>3</sub>, 400 MHz): δ 7.38-7.36 (m, 1H), 7.29-7.27 (m, 1H), 7.11-7.09 (m, 2H), 3.35 (s, 3H), 2.42 (s, 3H); <sup>13</sup>C NMR (CDCl<sub>3</sub>, 150 MHz): δ 144.6, 140.4, 139.7, 130.5, 129.9, 127.5, 124.0, 110.7, 36.7, 21.2. ESI HRMS: calcd. for C<sub>10</sub>H<sub>10</sub>N<sub>2</sub>O+Na<sup>+</sup> 197.0685, found 197.0688. Elemental Analysis: C, 68.95; H, 5.79; N, 16.08, found C, 69.03; H, 5.72; N, 16.05. IR (KBr, cm<sup>-1</sup>): 3067, 2945, 2231, 1683, 1587, 1489, 1392, 1017, 690.

### Methyl(p-tolyl)carbamoyl cyanide (2d)

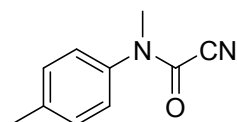

**2d**

Pale yellow solid, mp. 72-76 °C; <sup>1</sup>H NMR (CDCl<sub>3</sub>, 400 MHz): δ 7.16 (d, *J* = 8.4 Hz, 2H), 7.19 (d, *J* = 8.4 Hz, 2H), 3.34 (s, 3H), 2.41 (s, 3H). ESI HRMS: calcd. for C<sub>10</sub>H<sub>10</sub>N<sub>2</sub>O+Na<sup>+</sup> 197.0685,

found 197.0688. Elemental Analysis: C, 68.95; H, 5.79; N, 16.08, found C, 69.01; H, 5.75; N, 16.04. IR (KBr,  $\text{cm}^{-1}$ ): 3064, 2948, 2236, 1686, 1585, 1485, 1387, 1011, 700.

**(4-Methoxyphenyl)(methyl)carbamoyl cyanide (2e)**

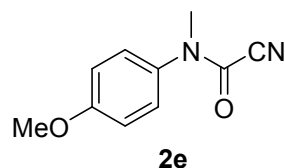

White solid, mp. 80-86 °C;  $^1\text{H}$  NMR ( $\text{CDCl}_3$ , 400 MHz):  $\delta$  7.23 (d,  $J = 8.4$  Hz, 2H), 6.99 (d,  $J = 8.4$  Hz, 2H), 3.85 (s, 3H), 3.32 (s, 3H). ESI HRMS: calcd. for  $\text{C}_{10}\text{H}_{10}\text{N}_2\text{O}_2 + \text{Na}^+$  213.0634, found 213.0638. Elemental Analysis: C, 63.15; H, 5.30; N, 14.73, found C, 63.24; H, 5.37; N, 14.55. IR (KBr,  $\text{cm}^{-1}$ ): 3062, 2944, 2848, 2234, 1687, 1609, 1511, 1389, 1016, 723.

**(3-Bromophenyl)(methyl)carbamoyl cyanide (2f)**

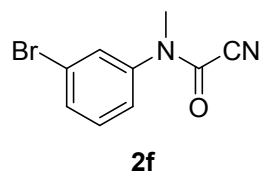

Yellow liquid;  $^1\text{H}$  NMR ( $\text{CDCl}_3$ , 600 MHz):  $\delta$  7.63 (d,  $J = 8.4$  Hz, 1H), 7.50-7.49 (m, 1H), 7.39 (t,  $J = 8.4$  Hz, 1H), 7.28 (d,  $J = 8.4$  Hz, 1H), 3.36 (s, 3H);  $^{13}\text{C}$  NMR ( $\text{CDCl}_3$ , 150 MHz):  $\delta$  144.3, 140.9, 133.0, 131.4, 130.2, 125.9, 123.4, 110.3, 36.8. ESI HRMS: calcd. for  $\text{C}_9\text{H}_7\text{BrN}_2\text{O} + \text{Na}^+$  260.9634, found 260.9639. Elemental Analysis: C, 45.22; H, 2.95; N, 11.72, found C, 45.30; H, 2.90; N, 11.70. IR (KBr,  $\text{cm}^{-1}$ ): 3068, 2924, 2231, 1683, 1585, 1475, 1373, 1044, 692.

**(4-Bromophenyl)(methyl)carbamoyl cyanide (2g)**

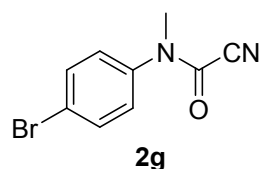

Pale yellow solid, mp. 100-102 °C;  $^1\text{H}$  NMR ( $\text{CDCl}_3$ , 400 MHz):  $\delta$  7.66-7.57 (m, 2H), 7.26-7.18 (m, 2H), 3.35 (s, 3H);  $^{13}\text{C}$  NMR ( $\text{CDCl}_3$ , 150 MHz):  $\delta$  144.3, 138.8, 133.4, 128.6, 123.9, 110.4, 36.7. ESI HRMS: calcd. for  $\text{C}_9\text{H}_7\text{BrN}_2\text{O} + \text{Na}^+$  260.9634, found 260.9637. Elemental Analysis: C, 45.22; H, 2.95; N, 11.72, found C, 45.35; H, 2.89; N, 11.70. IR (KBr,  $\text{cm}^{-1}$ ): 3067, 2923, 2233, 1682, 1583, 1474, 1373, 1044, 699.

**(3-Chlorophenyl)(methyl)carbamoyl cyanide (2h)**

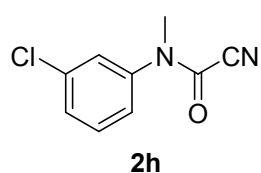

Yellow liquid;  $^1\text{H}$  NMR ( $\text{CDCl}_3$ , 400 MHz):  $\delta$  7.48-7.44 (m, 2H), 7.34-7.33 (m, 1H), 7.25-7.22 (m, 1H), 3.37 (s, 3H);  $^{13}\text{C}$  NMR ( $\text{CDCl}_3$ , 150 MHz):  $\delta$  144.3, 140.8, 135.8, 131.1, 130.1, 127.3, 125.4, 110.3, 36.8. ESI HRMS: calcd. for  $\text{C}_9\text{H}_7\text{ClN}_2\text{O}+\text{Na}^+$  217.0139, found 217.0140. Elemental Analysis: C, 55.54; H, 3.63; N, 14.39, found C, 55.60; H, 3.59; N, 14.37. IR (KBr,  $\text{cm}^{-1}$ ): 3066, 2925, 2231, 1685, 1586, 1477, 1373, 1028, 677.

#### (4-Chlorophenyl)(methyl)carbamoyl cyanide (2i)

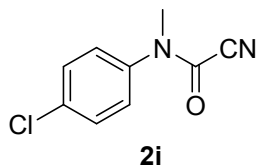

Pale yellow liquid;  $^1\text{H}$  NMR ( $\text{CDCl}_3$ , 400 MHz):  $\delta$  7.49 (d,  $J = 8.8$  Hz, 2H), 7.27 (d,  $J = 8.8$  Hz, 2H), 3.35 (s, 3H);  $^{13}\text{C}$  NMR ( $\text{CDCl}_3$ , 150 MHz):  $\delta$  144.4, 138.3, 135.9, 130.4, 128.4, 110.4, 36.8. ESI HRMS: calcd. for  $\text{C}_9\text{H}_7\text{ClN}_2\text{O}+\text{Na}^+$  217.0139, found 217.0141. Elemental Analysis: C, 55.54; H, 3.63; N, 14.39, found C, 55.62; H, 3.58; N, 14.36. IR (KBr,  $\text{cm}^{-1}$ ): 3060, 2948, 2233, 1680, 1591, 1485, 1378, 1012, 713.

#### Methyl(4-nitrophenyl)carbamoyl cyanide (2j)

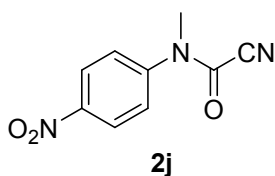

Pale yellow solid, mp. 98-102 °C;  $^1\text{H}$  NMR ( $\text{CDCl}_3$ , 400 MHz):  $\delta$  7.65 (d,  $J = 8.4$  Hz, 2H), 7.21 (d,  $J = 8.4$  Hz, 2H), 3.35 (s, 3H);  $^{13}\text{C}$  NMR ( $\text{CDCl}_3$ , 150 MHz):  $\delta$  144.3, 138.8, 133.4, 128.6, 123.9, 110.4, 36.7. ESI HRMS: calcd. for  $\text{C}_9\text{H}_7\text{N}_3\text{O}_3+\text{Na}^+$  228.0380, found 228.0382. Elemental Analysis: C, 52.69; H, 3.44; N, 20.48, found C, 52.77; H, 3.39; N, 20.43. IR (KBr,  $\text{cm}^{-1}$ ): 3063, 2936, 2233, 1689, 1587, 1489, 1392, 1014, 719.

#### Ethyl(phenyl)carbamoyl cyanide (2k)

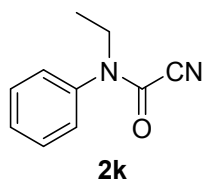

Yellow solid, mp. 90-92 °C;  $^1\text{H}$  NMR ( $\text{CDCl}_3$ , 600 MHz):  $\delta$  7.53-7.50 (m, 3H), 7.29-7.28 (m, 2H), 3.83 (q,  $J = 7.2$  Hz, 2H), 1.18 (t,  $J = 7.2$  Hz, 3H);  $^{13}\text{C}$  NMR ( $\text{CDCl}_3$ , 150 MHz):  $\delta$  144.3, 138.2, 130.1, 129.9, 128.1, 110.6, 44.4, 12.3. ESI HRMS: calcd. for  $\text{C}_{10}\text{H}_{10}\text{N}_2\text{O}+\text{Na}^+$  197.0685, found 197.0689. Elemental Analysis: C, 68.95; H, 5.79; N, 16.08, found C, 69.02; H, 5.77; N, 16.02. IR (KBr,  $\text{cm}^{-1}$ ): 3062, 2933, 2235, 1686, 1586, 1488, 1389, 1032, 696.

#### Ethyl(o-tolyl)carbamoyl cyanide (2l)

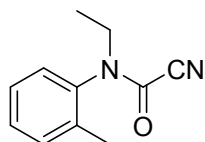

**2l**

Yellow liquid;  $^1\text{H}$  NMR ( $\text{CDCl}_3$ , 400 MHz):  $\delta$  7.43-7.34 (m, 2H), 7.33-7.31 (m, 1H), 7.19-7.17 (m, 1H), 4.06-3.99 (m, 1H), 3.50-3.43 (m, 1H), 2.31 (s, 3H), 1.19 (t,  $J = 7.2$  Hz, 3H);  $^{13}\text{C}$  NMR ( $\text{CDCl}_3$ , 150 MHz):  $\delta$  144.8, 136.9, 136.5, 131.9, 130.3, 129.4, 127.5, 110.7, 43.6, 17.5, 12.2. ESI HRMS: calcd. for  $\text{C}_{11}\text{H}_{12}\text{N}_2\text{O}+\text{Na}^+$  211.0842, found 211.0846. Elemental Analysis: C, 70.19; H, 6.43; N, 14.88, found C, 70.26; H, 6.51; N, 14.72. IR (KBr,  $\text{cm}^{-1}$ ): 3065, 2944, 2233, 1684, 1584, 1500, 1379, 1020, 688.

#### Ethyl(p-tolyl)carbamoyl cyanide (2m)

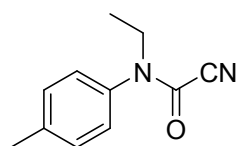

**2m**

White solid, mp. 56-60  $^\circ\text{C}$ ;  $^1\text{H}$  NMR ( $\text{CDCl}_3$ , 600 MHz):  $\delta$  7.31-7.26 (m, 2H), 7.25-7.15 (m, 2H), 3.80 (q,  $J = 7.2$  Hz, 2H), 2.42 (s, 3H), 1.82 (t,  $J = 7.2$  Hz, 3H);  $^{13}\text{C}$  NMR ( $\text{CDCl}_3$ , 150 MHz):  $\delta$  144.4, 140.1, 135.5, 130.7, 127.9, 110.8, 44.3, 21.1, 12.3. ESI HRMS: calcd. for  $\text{C}_{11}\text{H}_{12}\text{N}_2\text{O}+\text{Na}^+$  211.0842, found 211.0845. Elemental Analysis: C, 70.19; H, 6.43; N, 14.88, found C, 70.27; H, 6.38; N, 14.83. IR (KBr,  $\text{cm}^{-1}$ ): 3068, 2936, 2231, 1676, 1589, 1485, 1394, 1016, 698.

#### (4-Methoxybenzyl)(phenyl)carbamoyl cyanide (2n)

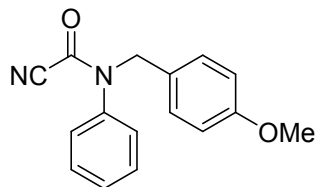

**2n**

Yellow liquid;  $^1\text{H}$  NMR ( $\text{CDCl}_3$ , 600 MHz):  $\delta$  7.45-7.40 (m, 3H), 7.08-7.07 (m, 4H), 6.81 (d,  $J = 8.4$  Hz, 2H), 4.85 (s, 2H), 3.79 (s, 3H);  $^{13}\text{C}$  NMR ( $\text{CDCl}_3$ , 150 MHz):  $\delta$  159.6, 144.7, 138.1, 130.5, 129.9, 129.8, 128.4, 126.6, 114.1, 110.5, 55.2, 52.5. ESI HRMS: calcd. for  $\text{C}_{16}\text{H}_{14}\text{N}_2\text{O}_2+\text{Na}^+$  289.0947, found 289.0954. Elemental Analysis: C, 72.17; H, 5.30; N, 10.52, found C, 72.25; H, 5.23; N, 10.59. IR (KBr,  $\text{cm}^{-1}$ ): 3066, 2936, 2840, 2230, 1676, 1610, 1594, 1512, 1442, 1395, 1032, 698.

#### Allyl(phenyl)carbamoyl cyanide (2o)

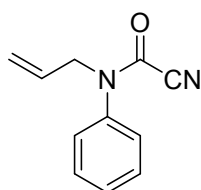

**2o**

Pale yellow solid, mp. 50-54 °C; <sup>1</sup>H NMR (CDCl<sub>3</sub>, 600 MHz): δ 7.51-7.49 (m, 3H), 7.30-7.25 (m, 2H), 5.84-5.77 (m, 1H), 5.25-5.18 (m, 2H), 4.35 (d, *J* = 6.0 Hz, 2H); <sup>13</sup>C NMR (CDCl<sub>3</sub>, 150 MHz): δ 144.4, 138.4, 130.2, 130.0, 129.9, 128.0, 120.3, 110.5, 52.0. ESI HRMS: calcd. for C<sub>11</sub>H<sub>10</sub>N<sub>2</sub>O+Na<sup>+</sup> 209.0685, found 209.0687. Elemental Analysis: C, 70.95; H, 5.41; N, 15.04, found C, 71.02; H, 5.49; N, 14.94. IR (KBr, cm<sup>-1</sup>): 3090, 3064, 2927, 2230, 1674, 1589, 1489, 1394, 997, 700.

**[1,1'-Biphenyl]-4-yl(methyl)carbamoyl cyanide (2p)**

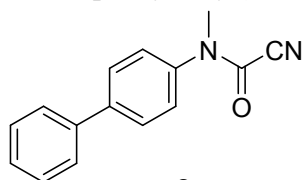

**2p**

Pale yellow solid, mp. 140-144 °C; <sup>1</sup>H NMR (CDCl<sub>3</sub>, 600 MHz): δ 7.71 (d, *J* = 8.4 Hz, 2H), 7.60 (d, *J* = 7.2 Hz, 2H), 7.48 (t, *J* = 7.2 Hz, 2H), 7.41 (t, *J* = 7.2 Hz, 2H), 7.39-7.38 (m, 1H), 3.41 (s, 3H); <sup>13</sup>C NMR (CDCl<sub>3</sub>, 150 MHz): δ 144.5, 142.8, 139.4, 138.8, 129.0, 128.7, 128.1, 127.3, 127.2, 110.7, 36.8. ESI HRMS: calcd. for C<sub>15</sub>H<sub>12</sub>N<sub>2</sub>O+Na<sup>+</sup> 259.0842, found 259.0843. Elemental Analysis: C, 76.25; H, 5.12; N, 11.86, found C, 76.32; H, 5.10; N, 11.80. IR (KBr, cm<sup>-1</sup>): 3060, 2938, 2230, 1687, 1604, 1518, 1480, 1390, 1021, 708.

**(4'-Fluoro-[1,1'-biphenyl]-4-yl)(methyl)carbamoyl cyanide (2q)**

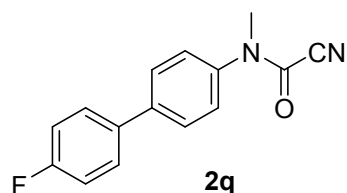

**2q**

Yellow solid, mp. 108-112 °C; <sup>1</sup>H NMR (CDCl<sub>3</sub>, 600 MHz): δ 7.66 (d, *J* = 8.4 Hz, 2H), 7.56 (t, *J* = 7.2 Hz, 2H), 7.38 (d, *J* = 8.4 Hz, 2H), 7.16 (t, *J* = 8.4 Hz, 2H), 3.40 (s, 3H); <sup>13</sup>C NMR (CDCl<sub>3</sub>, 150 MHz): δ 162.0, 144.5, 141.7, 138.8, 135.5, 128.8, 128.6, 127.3, 116.0, 115.9, 110.7, 36.8. ESI HRMS: calcd. for C<sub>15</sub>H<sub>11</sub>FN<sub>2</sub>O+Na<sup>+</sup> 277.0748, found 277.0753. Elemental Analysis: C, 70.86; H, 4.36; N, 11.02, found C, 70.95; H, 4.43; N, 10.86. IR (KBr, cm<sup>-1</sup>): 3057, 2945, 2230, 1678, 1600, 1520, 1481, 1385, 1097, 715.

**(3'-Chloro-[1,1'-biphenyl]-4-yl)(methyl)carbamoyl cyanide (2r)**

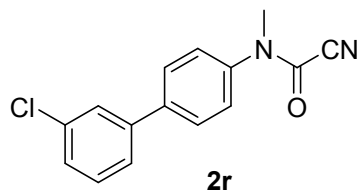

White solid, mp. 122-126 °C; <sup>1</sup>H NMR (CDCl<sub>3</sub>, 400 MHz): δ 7.68 (d, *J* = 8.4 Hz, 2H), 7.58 (s, 1H), 7.48-7.47 (m, 1H), 7.40 (d, *J* = 8.4 Hz, 4H), 3.41 (s, 3H); <sup>13</sup>C NMR (CDCl<sub>3</sub>, 150 MHz): δ 144.4, 141.3, 141.2, 139.3, 134.9, 130.2, 128.7, 128.1, 127.4, 127.3, 125.3, 110.6, 36.8. ESI HRMS: calcd. for C<sub>15</sub>H<sub>11</sub>ClN<sub>2</sub>O+Na<sup>+</sup> 293.0452, found 293.0453. Elemental Analysis: C, 66.55; H, 4.10; N, 10.35, found C, 66.64; H, 4.17; N, 10.21. IR (KBr, cm<sup>-1</sup>): 3060, 2948, 2235, 1688, 1604, 1521, 1483, 1388, 1098, 710.

**(4'-Chloro-[1,1'-biphenyl]-4-yl)(methyl)carbamoyl cyanide (2s)**

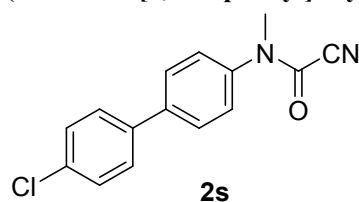

White solid, mp. 84-88 °C; <sup>1</sup>H NMR (CDCl<sub>3</sub>, 400 MHz): δ 7.67 (d, *J* = 8.4 Hz, 2H), 7.53 (d, *J* = 8.4 Hz, 2H), 7.45 (d, *J* = 8.4 Hz, 2H), 7.39 (d, *J* = 8.4 Hz, 2H), 3.40 (s, 3H); <sup>13</sup>C NMR (CDCl<sub>3</sub>, 150 MHz): δ 144.5, 141.5, 139.0, 137.8, 134.3, 129.2, 128.6, 128.4, 127.4, 110.6, 36.8. ESI HRMS: calcd. for C<sub>15</sub>H<sub>11</sub>ClN<sub>2</sub>O+Na<sup>+</sup> 293.0452, found 293.0463. Elemental Analysis: C, 66.55; H, 4.10; N, 10.35, found C, 66.62; H, 4.18; N, 10.30. IR (KBr, cm<sup>-1</sup>): 3059, 2949, 2236, 1689, 1602, 1520, 1483, 1389, 1099, 711.

**Methyl(3'-nitro-[1,1'-biphenyl]-4-yl)carbamoyl cyanide (2t)**

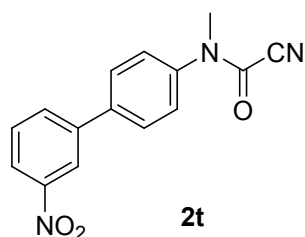

White solid, mp. 142-146 °C; <sup>1</sup>H NMR (CDCl<sub>3</sub>, 600 MHz): δ 8.47 (s, 1H), 8.27 (d, *J* = 7.8 Hz, 1H), 7.94 (d, *J* = 7.8 Hz, 1H), 7.77 (d, *J* = 7.8 Hz, 2H), 7.67 (t, *J* = 7.8 Hz, 1H), 7.47-7.46 (m, 2H), 3.34 (s, 3H); <sup>13</sup>C NMR (CDCl<sub>3</sub>, 150 MHz): δ 148.8, 144.4, 141.1, 140.2, 140.0, 133.0, 130.1, 128.9, 127.7, 122.9, 122.1, 110.6, 36.8. ESI HRMS: calcd. for C<sub>15</sub>H<sub>11</sub>N<sub>3</sub>O<sub>3</sub>+Na<sup>+</sup> 304.0693, found 304.0696. Elemental Analysis: C, 64.05; H, 3.94; N, 14.94, found C, 64.18; H, 3.88; N, 14.86. IR (KBr, cm<sup>-1</sup>): 3067, 2933, 2230, 1678, 1608, 1510, 1477, 1392, 1012, 699.

**(3'-Cyano-[1,1'-biphenyl]-4-yl)(methyl)carbamoyl cyanide (2u)**



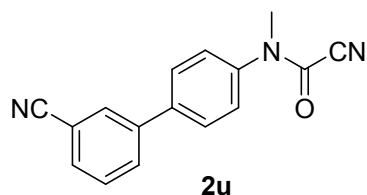

White solid, mp. 136-138 °C; <sup>1</sup>H NMR (CDCl<sub>3</sub>, 400 MHz): δ 7.88 (s, 1H), 7.85-7.82 (m, 1H), 7.70 (d, *J* = 8.4 Hz, 2H), 7.62-7.58 (m, 2H), 7.44 (d, *J* = 8.4 Hz, 2H), 3.42 (s, 3H); <sup>13</sup>C NMR (CDCl<sub>3</sub>, 150 MHz): δ 144.4, 140.7, 140.3, 139.8, 131.5, 130.7, 129.9, 128.8, 127.7, 125.5, 118.5, 113.3, 110.5, 36.8. ESI HRMS: calcd. for C<sub>16</sub>H<sub>11</sub>N<sub>3</sub>O+Na<sup>+</sup> 284.0794, found 284.0794. Elemental Analysis: C, 73.55; H, 4.24; N, 16.08, found C, 73.62; H, 4.32; N, 15.98. IR (KBr, cm<sup>-1</sup>): 3068, 2925, 2230, 1682, 1607, 1514, 1479, 1393, 1016, 688.

**(3',5'-Dichloro-[1,1'-biphenyl]-4-yl)(methyl)carbamoyl cyanide (2v)**

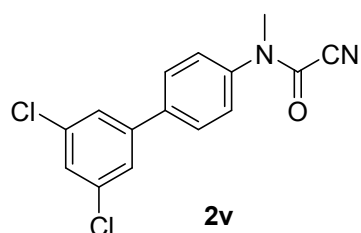

White solid, mp. 146-152 °C; <sup>1</sup>H NMR (CDCl<sub>3</sub>, 400 MHz): δ 7.68-7.62 (m, 3H), 7.47-7.40 (m, 4H), 3.41 (s, 3H); <sup>13</sup>C NMR (CDCl<sub>3</sub>, 150 MHz): δ 144.4, 142.3, 140.0, 139.8, 135.6, 128.8, 128.0, 127.6, 125.7, 110.5, 36.8. ESI HRMS: calcd. for C<sub>15</sub>H<sub>10</sub>Cl<sub>2</sub>N<sub>2</sub>O+Na<sup>+</sup> 327.0062, found 327.0066. Elemental Analysis: C, 59.04; H, 3.30; N, 9.18, found C, 59.11; H, 3.38; N, 9.32. IR (KBr, cm<sup>-1</sup>): 3065, 2940, 2233, 1683, 1599, 1498, 1390, 1014, 718.

**Methyl(4-(thiophen-2-yl)phenyl)carbamoyl cyanide (2w)**

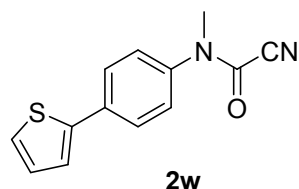

Pale yellow solid, mp. 150-156 °C; <sup>1</sup>H NMR (CDCl<sub>3</sub>, 400 MHz): δ 7.74-7.72 (m, 2H), 7.38-7.31 (m, 4H), 7.13-7.11 (m, 1H), 3.38 (s, 3H); <sup>13</sup>C NMR (CDCl<sub>3</sub>, 150 MHz): δ 144.5, 142.3, 138.5, 135.9, 128.3, 127.4, 127.3, 126.1, 124.3, 110.6, 36.7. ESI HRMS: calcd. for C<sub>13</sub>H<sub>10</sub>N<sub>2</sub>SO+Na<sup>+</sup> 265.0406, found 265.0406. Elemental Analysis: C, 64.44; H, 4.16; N, 11.56; S, 13.23, found C, 64.53; H, 4.23; N, 11.50; S, 13.03. IR (KBr, cm<sup>-1</sup>): 3065, 2943, 2231, 1683, 1592, 1489, 1379, 1012, 699.

**Piperidine-1-carbonyl cyanide (2x)<sup>[2]</sup>**

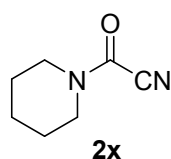

Colorless oil (Lit<sup>2</sup>); <sup>1</sup>H NMR (CDCl<sub>3</sub>, 400 MHz): δ 3.71-3.70 (m, 2H), 3.57 (t, *J* = 6.0 Hz, 2H), 1.71-1.69 (m, 4H), 1.62-1.59 (m, 2H).

### Diisopropylcarbamoyl cyanide (2y)<sup>[3]</sup>

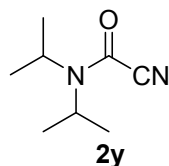

Colorless oil (Lit<sup>3</sup>); <sup>1</sup>H NMR (CDCl<sub>3</sub>, 400 MHz): δ 4.47-4.39 (m, 2H), 1.43-1.36 (m, 6H), 1.31-1.24 (m, 6H).

### Phenylcarbamoyl cyanide (2z)<sup>[2]</sup>

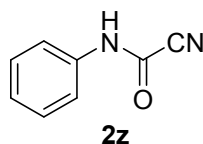

Pale yellow solid, mp. 100-104 °C (Lit<sup>2</sup> 104-106 °C); <sup>1</sup>H NMR (CDCl<sub>3</sub>, 600 MHz): δ 8.29 (bs, 1H), 7.60 (d, *J* = 8.4 Hz, 2H), 7.36 (t, *J* = 7.6 Hz, 2H), 7.17 (t, *J* = 7.6 Hz, 1H).

### 3-Methylpiperidine-1-carbonyl cyanide (2za)

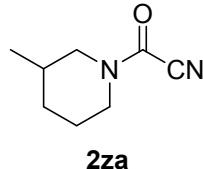

Colorless oil; <sup>1</sup>H NMR (CDCl<sub>3</sub>, 400 MHz): δ 4.29-4.02 (m, 2H), 3.25-2.44 (m, 2H), 1.92-1.44 (m, 4H), 1.29-1.17 (m, 1H), 0.98 (d, *J* = 6.8 Hz, 3H); <sup>13</sup>C NMR (CDCl<sub>3</sub>, 150 MHz): δ 144.3, 110.6, 54.8, 48.0, 34.2, 28.8, 23.4, 18.6. ESI HRMS: calcd. for C<sub>8</sub>H<sub>12</sub>N<sub>2</sub>O+Na<sup>+</sup> 175.0842, found 175.0845. Elemental Analysis: C, 63.13; H, 7.95; N, 18.41; found C, 63.21; H, 7.90; N, 18.36. IR (KBr, cm<sup>-1</sup>): 3040, 2895, 2854, 2229, 1689, 1186.

### Propylcarbamoyl cyanide (2zb)

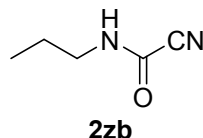

Colorless oil; <sup>1</sup>H NMR (CDCl<sub>3</sub>, 400 MHz): δ 6.67 (s, 1H), 3.35-3.30 (m, 2H), 1.68-1.57 (m, 2H), 0.97 (t, *J* = 7.2 Hz, 3H); <sup>13</sup>C NMR (CDCl<sub>3</sub>, 150 MHz): δ 144.5, 110.4, 42.5, 23.2, 11.2. ESI HRMS: calcd. for C<sub>5</sub>H<sub>8</sub>N<sub>2</sub>O+Na<sup>+</sup> 135.0529, found 135.0530. Elemental Analysis: C, 53.56; H, 7.19; N, 24.98; found C, 53.69; H, 7.13; N, 24.90. IR (KBr, cm<sup>-1</sup>): 3436, 2923, 2853, 2237, 1684, 1255.

***tert*-Butyl (4-chlorophenyl)(cyanocarbonyl)carbamate (2zc)**

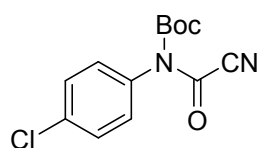

**2zc**

White solid, mp. 80-84 °C; <sup>1</sup>H NMR (CDCl<sub>3</sub>, 400 MHz): δ 7.32-7.30 (m, 2H), 7.25-7.23 (m, 2H), 1.51 (s, 9H). <sup>13</sup>C NMR (CDCl<sub>3</sub>, 150 MHz): δ 151.2, 144.2, 138.1, 134.7, 130.2, 128.2, 110.5, 84.5, 33.4. ESI HRMS: calcd. for C<sub>13</sub>H<sub>13</sub>ClN<sub>2</sub>O<sub>3</sub>+Na<sup>+</sup> 303.0507, found 303.0511. Elemental Analysis: C, 55.62; H, 4.67; N, 9.98; found C, 55.68; H, 4.63; N, 9.94. IR (KBr, cm<sup>-1</sup>): 2933, 2231, 1704, 1682, 1584, 1476, 1372, 1250, 1040, 710.

**Dibenzylcarbamoyl cyanide (2zd)**

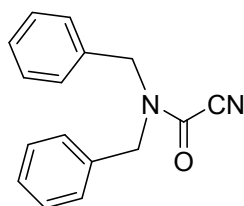

**2zd**

Yellow liquid; <sup>1</sup>H NMR (CDCl<sub>3</sub>, 400 MHz): δ 7.44-7.36 (m, 5H), 7.26-7.19 (m, 5H), 4.65 (s, 2H), 4.49 (s, 2H); <sup>13</sup>C NMR (CDCl<sub>3</sub>, 150 MHz): δ 144.4, 139.8, 136.9, 136.1, 128.5, 128.2, 128.0, 127.8, 127.7, 127.3, 127.1, 126.5, 126.1, 110.7, 52.1, 50.3. ESI HRMS: calcd. for C<sub>16</sub>H<sub>14</sub>N<sub>2</sub>O+Na<sup>+</sup> 273.0998, found 273.1003. Elemental Analysis: C, 76.78; H, 5.64; N, 11.19; found C, 76.85; H, 5.62; N, 11.13. IR (KBr, cm<sup>-1</sup>): 3065, 2230, 1688, 1618, 1489, 1470, 1381, 1235, 1024, 718, 694.

## (C) References

- [1] Marc, M.; Johannes, C.; Vogel, W. T. *Org. Biomol. Chem.*, **2009**, *7*, 589.
- [2] Yang, J. M.; Xiang, D. X.; Zhang, R.; Zhang, N.; Liang Y. J.; Dong, D. *Org. Lett.*, **2015**, *17*, 809.
- [3] Fu, X. P.; Chen, J. J.; Li, G. Y.; Liu, Y. H. *Angew. Chem. Int. Ed.*, **2009**, *48*, 5500.

## (D) $^1\text{H}$ NMR and $^{13}\text{C}$ NMR Spectra of Products

CK-2 H1 CDC13 2015-4-16  
Pulse Sequence: s2pu1

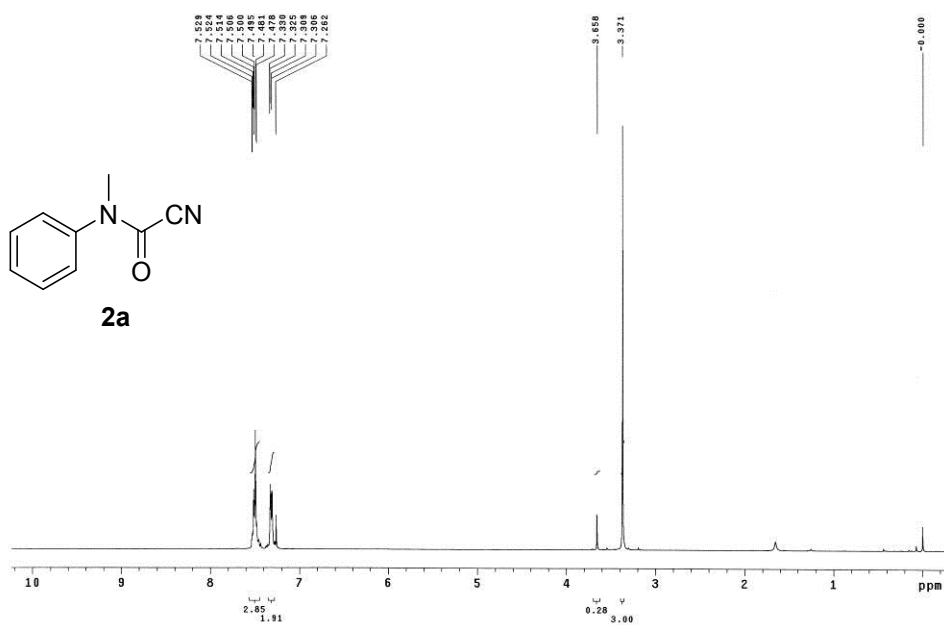

CK-20 C13 CDC13 2015-7-14  
Archive directory: /home/vmr1/vmr/sys/data  
Sample directory: OneProbe\_calib\_20140603\_05  
Pulse Sequence: s2pu1

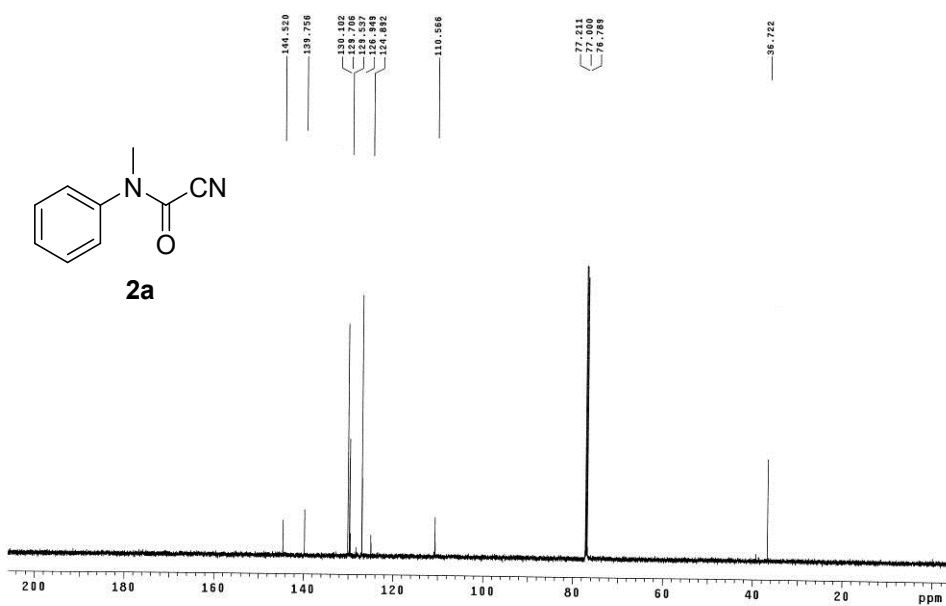

ZZ-18 H1 CDCl3 2015-7-1  
Archive directory: /home/vnmr1/vnmrsys/data  
Sample directory: OneProbe\_calib\_20140603\_05  
Pulse Sequence: s2pu1

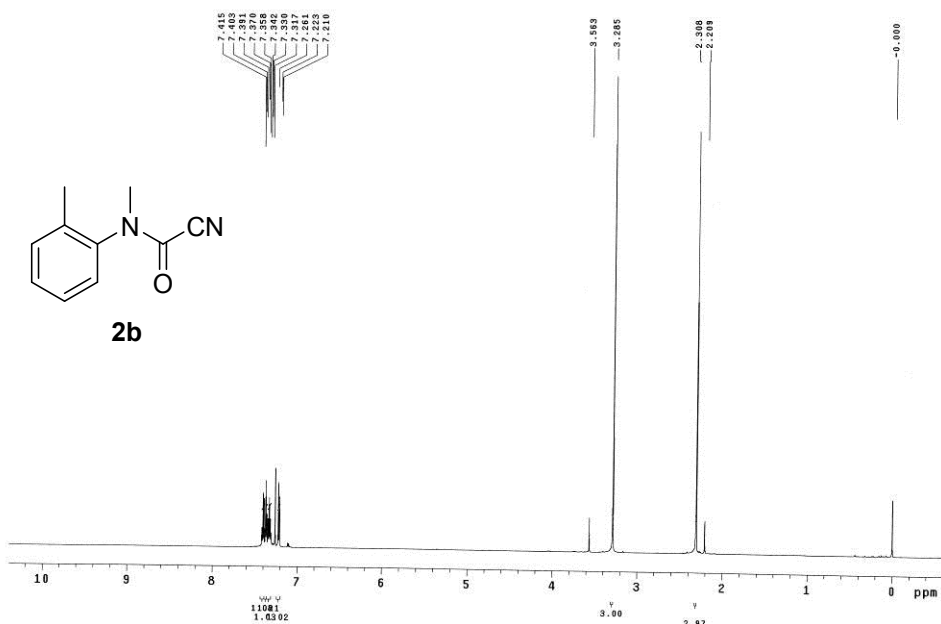

ZZ-180-CDCl3-C13-2015-7-4  
Archive directory: /home/vnmr1/vnmrsys/data  
Sample directory: OneProbe\_calib\_20140603\_05  
Pulse Sequence: s2pu1

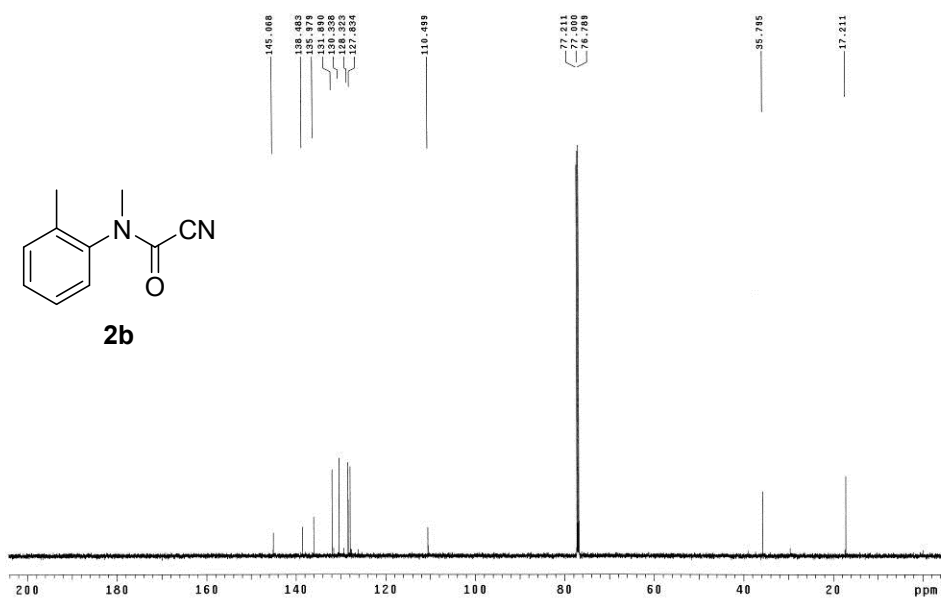

ZY-0618 H1 CDCl3 2015-8-18  
Pulse Sequence: s2pu1

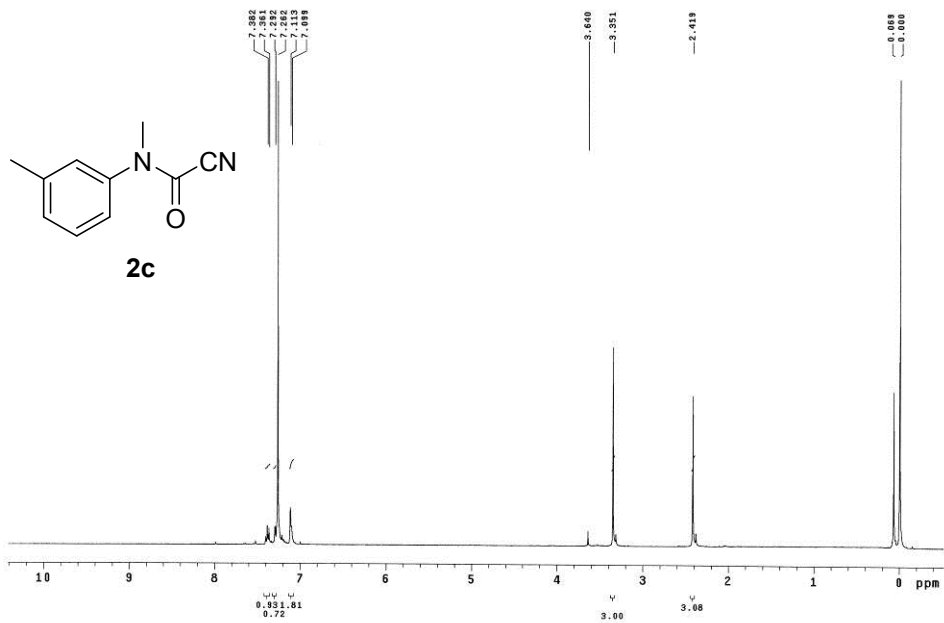

ZY-06180-CDCl3-C13-2015-7-16  
Archive directory: /home/vmr1/vmr/sys/data  
Sample directory: OneProbe\_calib\_20140603\_05  
Pulse Sequence: s2pu1

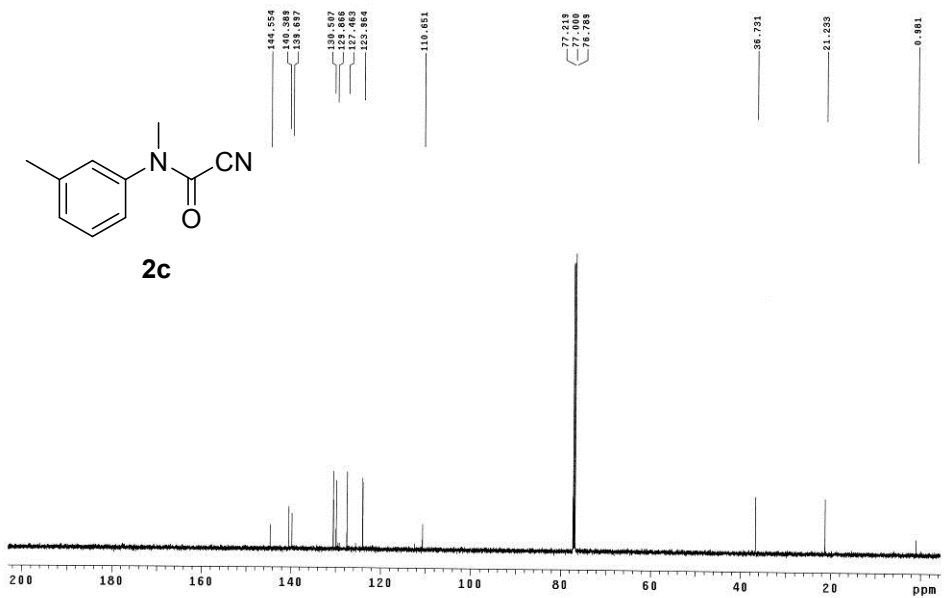

ZY-0623-1 H1 CDC13 2015-6-23  
Pulse Sequence: s2pu1

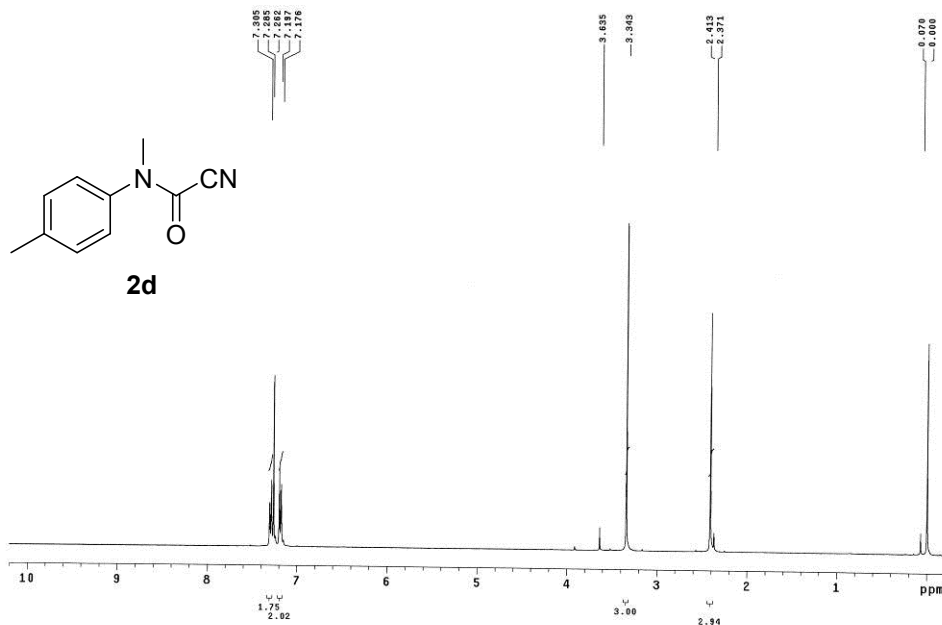

WXY-150506-2 H1 CDC13 2015-5-6  
Pulse Sequence: s2pu1

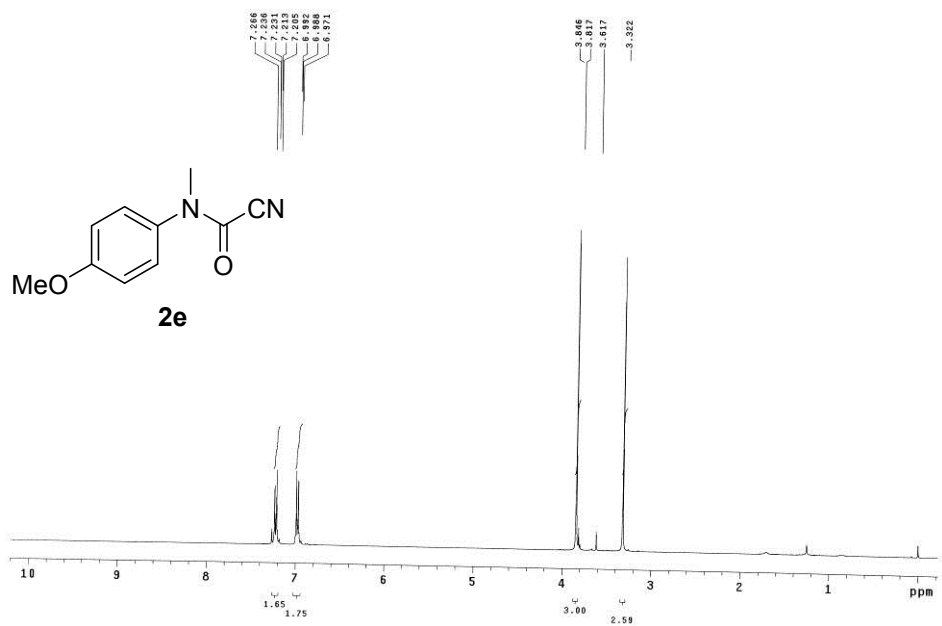



ZZ-16 H1 CDCl3 2015-7-1  
Archive directory: /home/vnmr1/vnmrSYS/data  
Sample directory: OneProbe\_calib\_20140603\_05  
Pulse Sequence: s2pu1

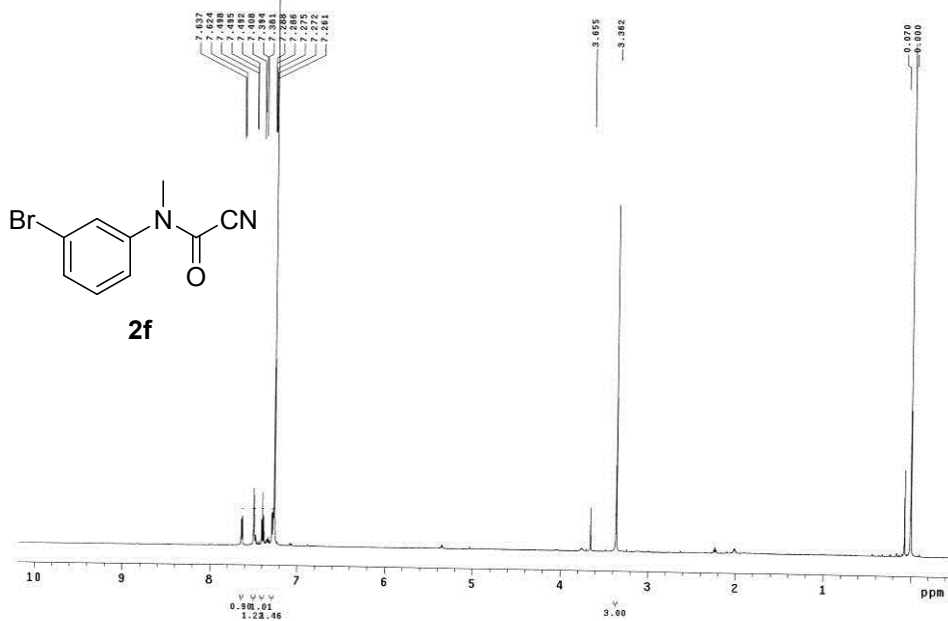

ZZ-160-CDCl3-C13-2015-7-4  
Archive directory: /home/vnmr1/vnmrSYS/data  
Sample directory: OneProbe\_calib\_20140603\_05  
Pulse Sequence: s2pu1

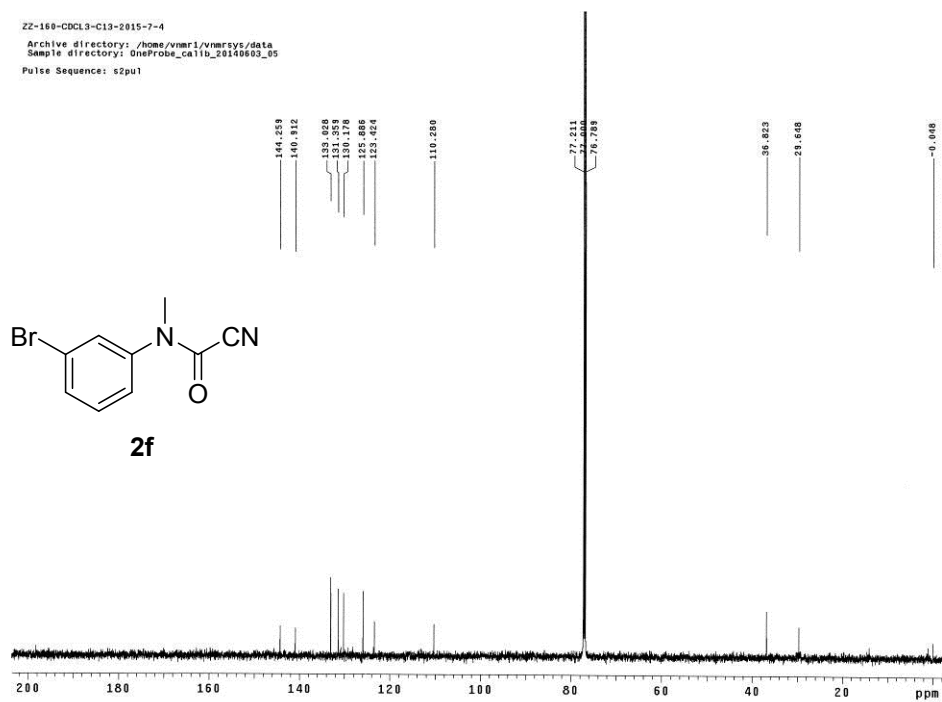

ZY-0519-1 H1 CDCl3 2015-6-19  
Pulse Sequence: s2pu1

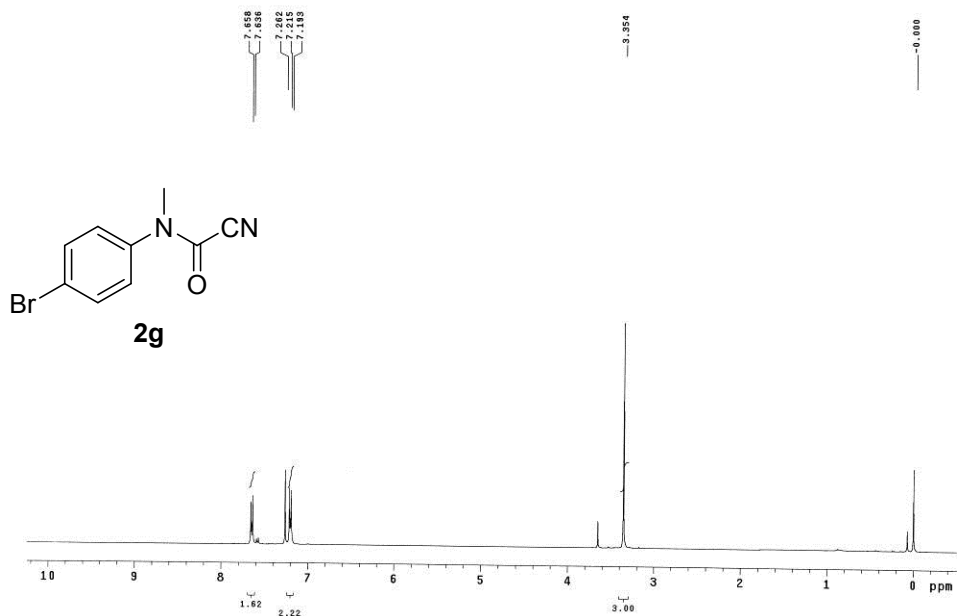

ZZ-200-CDCl3-C13-2015-7-7  
Archive directory: /home/vnmr1/vnmrsys/data  
Sample directory: OneProbe\_ca1ib\_20140603\_05  
Pulse Sequence: s2pu1

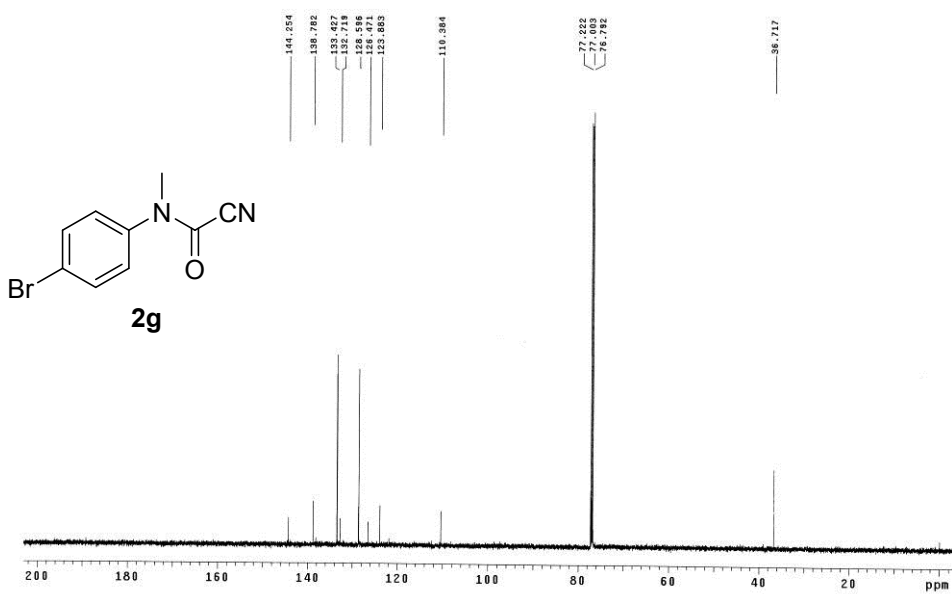

ZY-0616 H1 CDCl3 2015-6-16  
Pulse Sequence: s2pu1

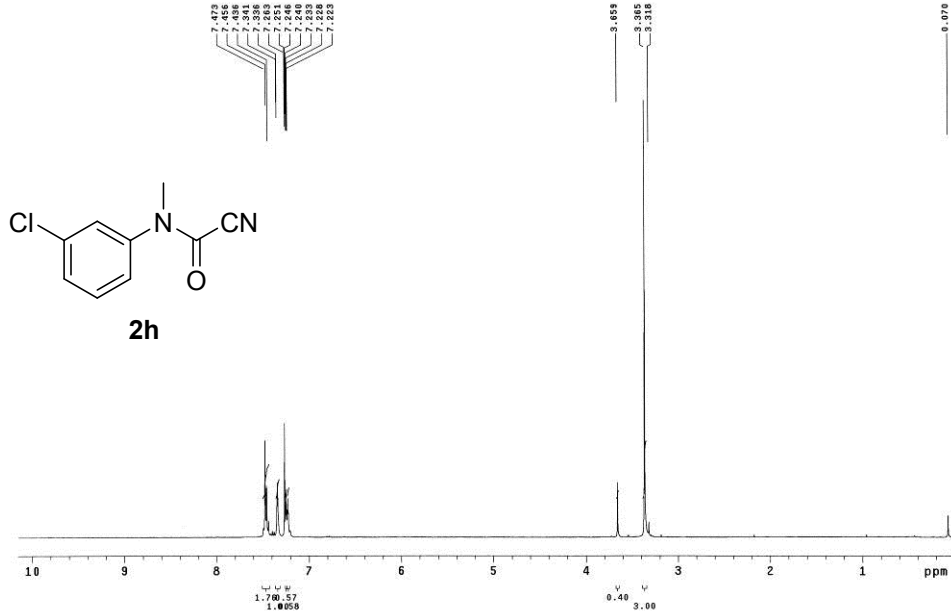

ZY-0616-CDCl3-C13-2015-7-16  
Archive directory: /home/vmr1/vmr/sys/data  
Sample directory: OneProbe\_calib\_Z0140603\_05  
Pulse Sequence: s2pu1

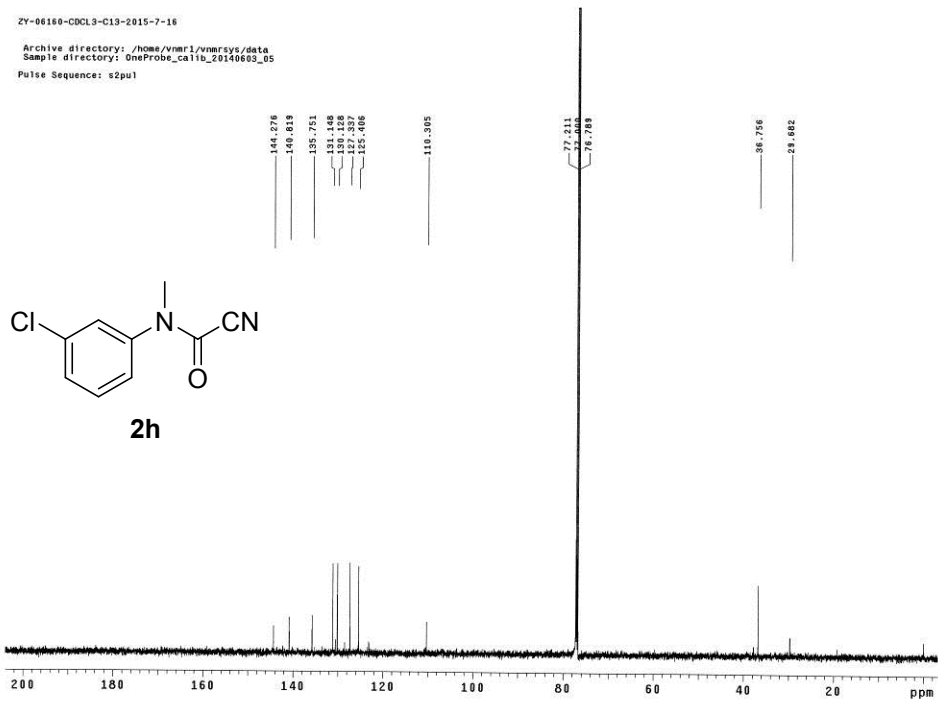

WKY-150506-1 H1 CDC13 2015-5-6  
Pulse Sequence: s2pu1

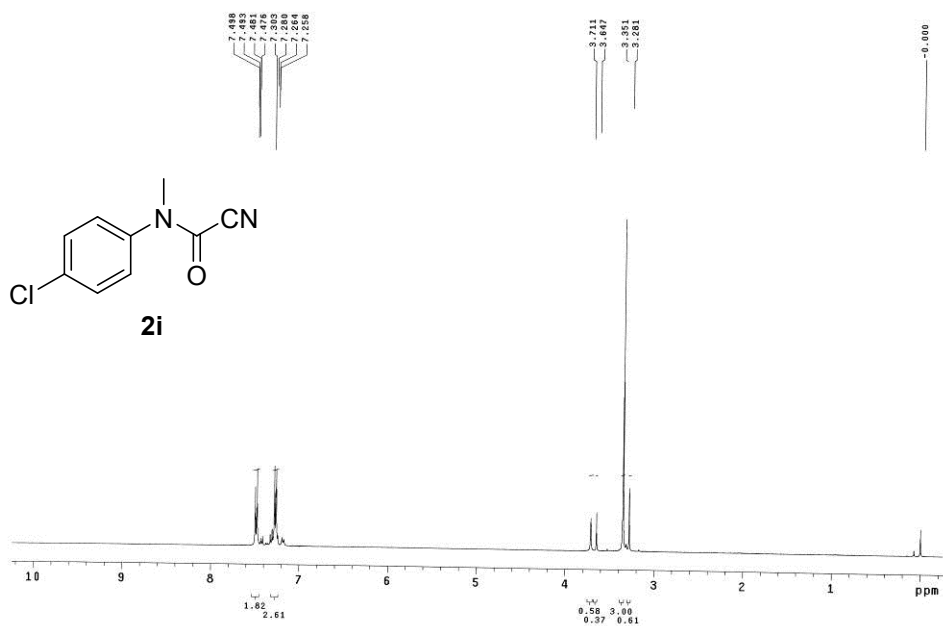

WKY-150506-10 C13 CDC13 2015-7-15  
Archive directory: /home/vmr1/vmrsys/data  
Sample directory: OneProbe\_calib\_20140603\_05  
Pulse Sequence: s2pu1

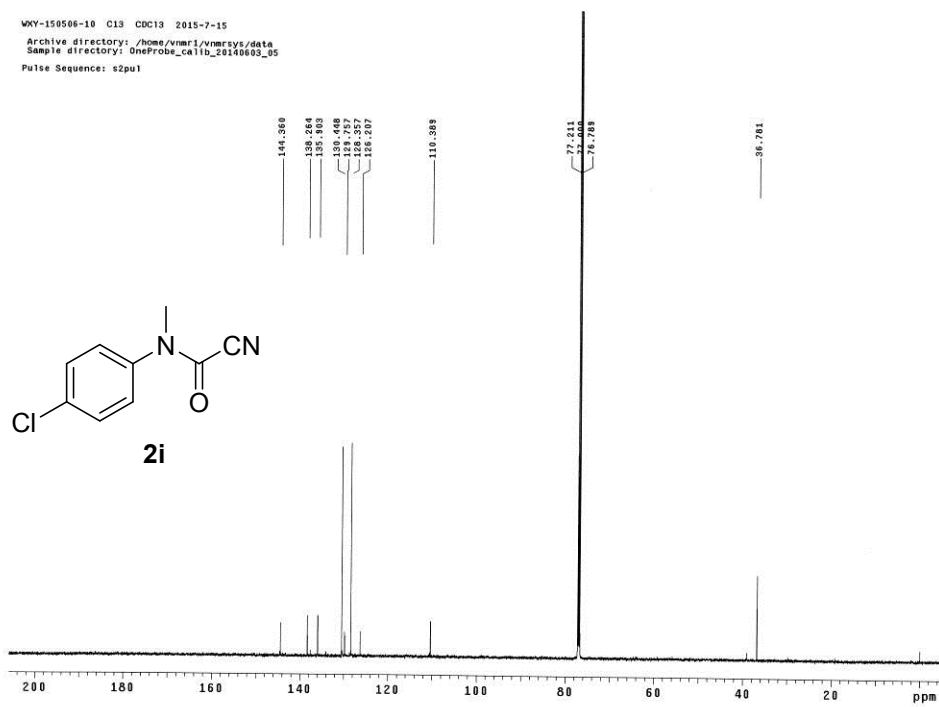

ZV-0617 H1 CDCl3 2015-6-17  
Pulse Sequence: s2pu1

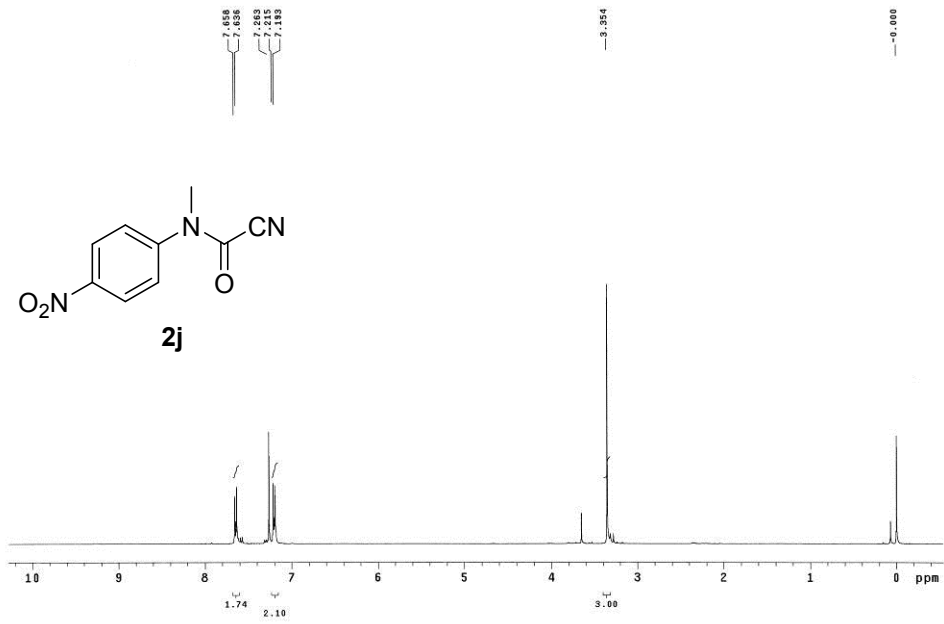

ZZ-250-CDCl3-C13-2015-7-11  
Archive directory: /home/vnmr1/vnmrsys/data  
Sample directory: OneProbe\_ca11b\_20140603\_05  
Pulse Sequence: s2pu1

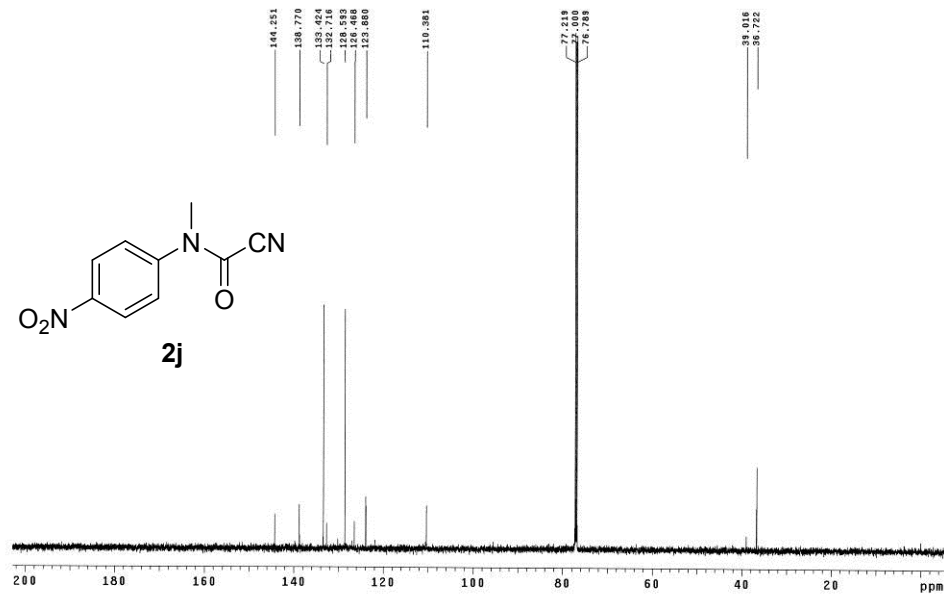

ZZ-17 H1 CDC13 2015-7-1  
Archive directory: /home/vmr1/vmrsys/data  
Sample directory: OneProbe\_calib\_20140603\_05  
Pulse Sequence: s2pu1

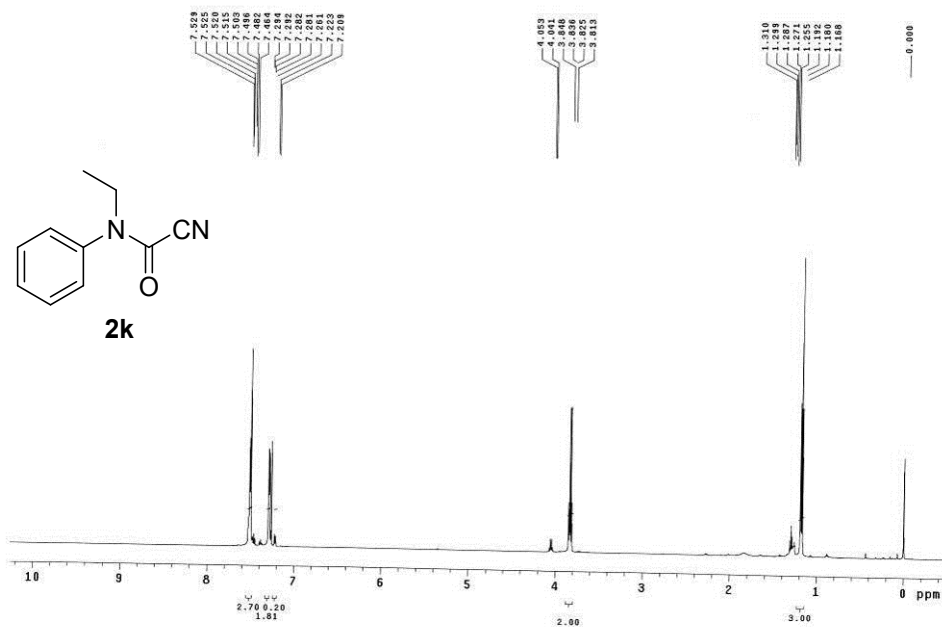

ZZ-170-CDCL3-C13-2015-7-4  
Archive directory: /home/vmr1/vmrsys/data  
Sample directory: OneProbe\_calib\_20140603\_05  
Pulse Sequence: s2pu1

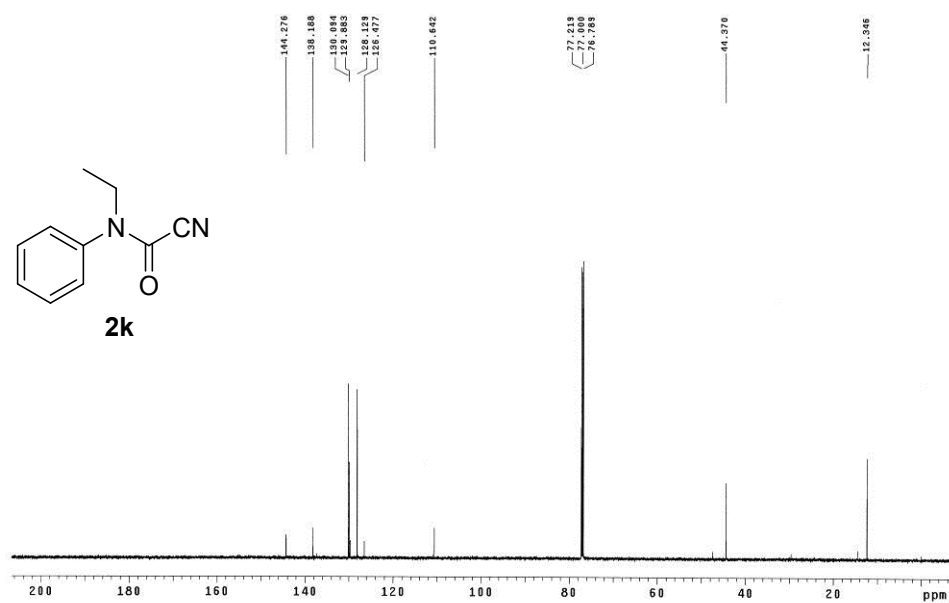

ZY-0623-2 H1 CDC13 2015-6-23  
Pulse Sequence: s2pu1

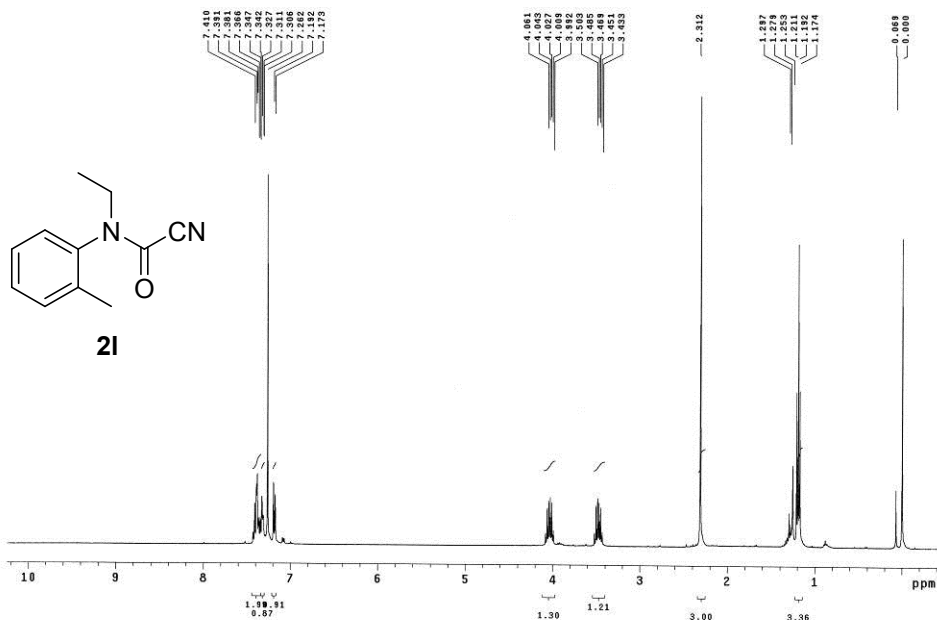

ZY-06230-CDCL3-C13-2015-7-16  
Archive directory: /home/vnmr1/vnmrsys/data  
Sample directory: OneProbe\_calib\_20140803\_05  
Pulse Sequence: s2pu1

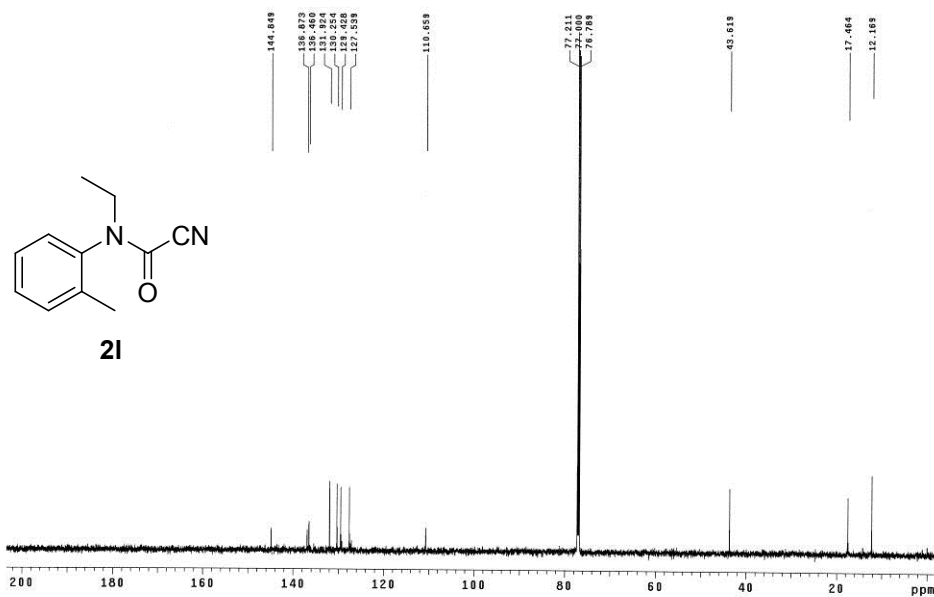

ZZ-21 H1 CDCl3 2015-7-3  
Pulse Sequence: s2pu1

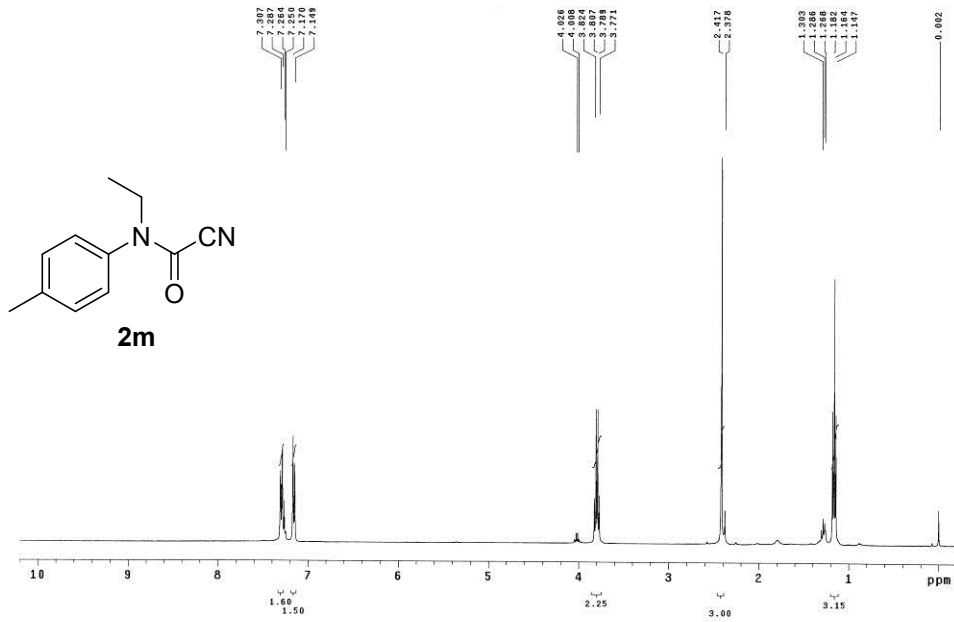

ZZ-210-CDCl3-C13-2015-7-7  
Archive directory: /home/vmr1/vmr/sys/data  
Sample directory: OneProbe\_calib\_20140603\_05  
Pulse Sequence: s2pu1

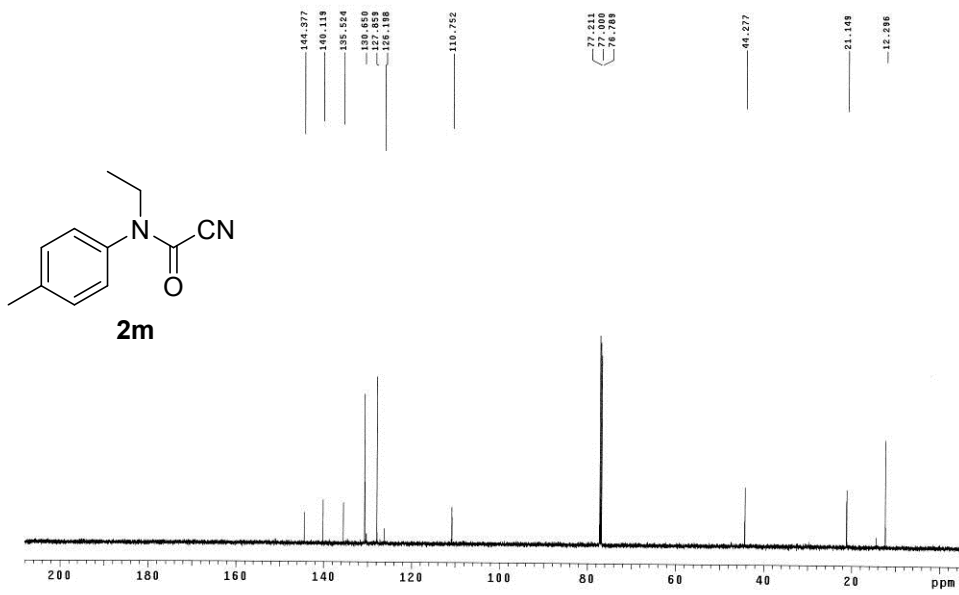



ZZ-19 H1 CDCl3 2015-7-1  
Archive directory: /home/vmr1/vmrsys/data  
Sample directory: OneProbe\_calib\_20140603\_05  
Pulse Sequence: s2pu1

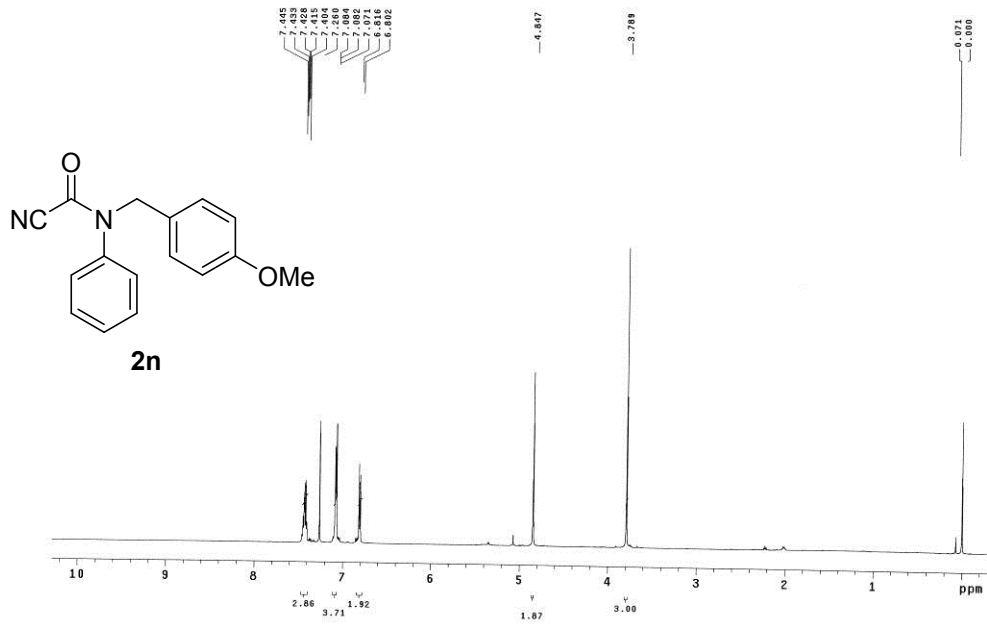

ZZ-190-CDCl3-G13-2015-7-4  
Archive directory: /home/vmr1/vmrsys/data  
Sample directory: OneProbe\_calib\_20140603\_05  
Pulse Sequence: s2pu1

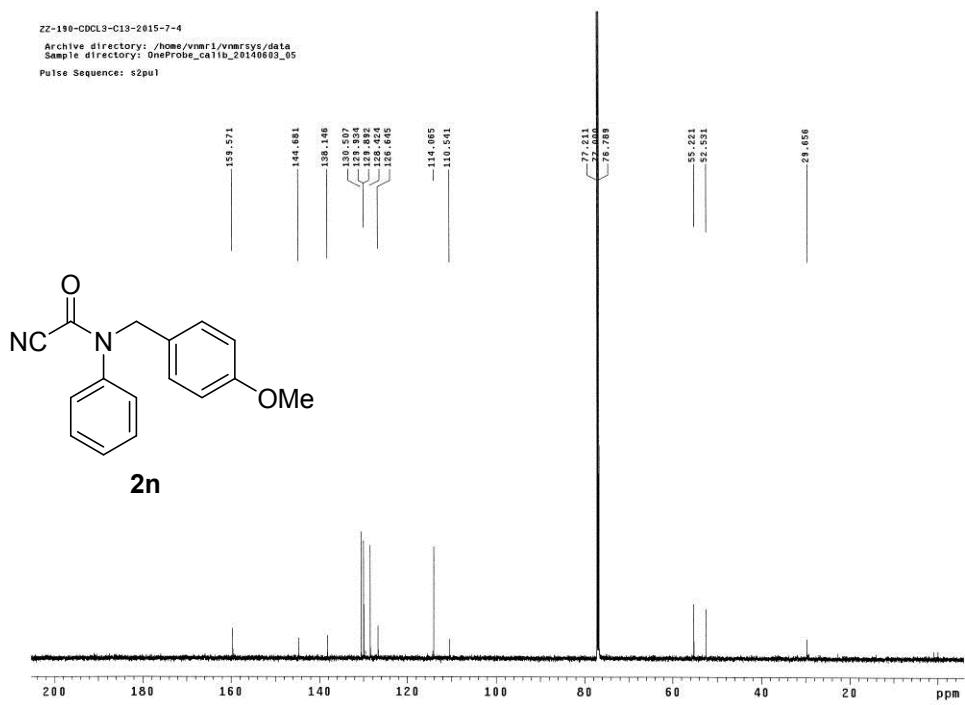

ZZ-13 H1 CDC13 2015-6-29  
 Archive directory: /home/vmri/vmr/sys/data  
 Sample directory: OneProbe\_calib\_20140603\_05  
 Pulse Sequence: s2pu1

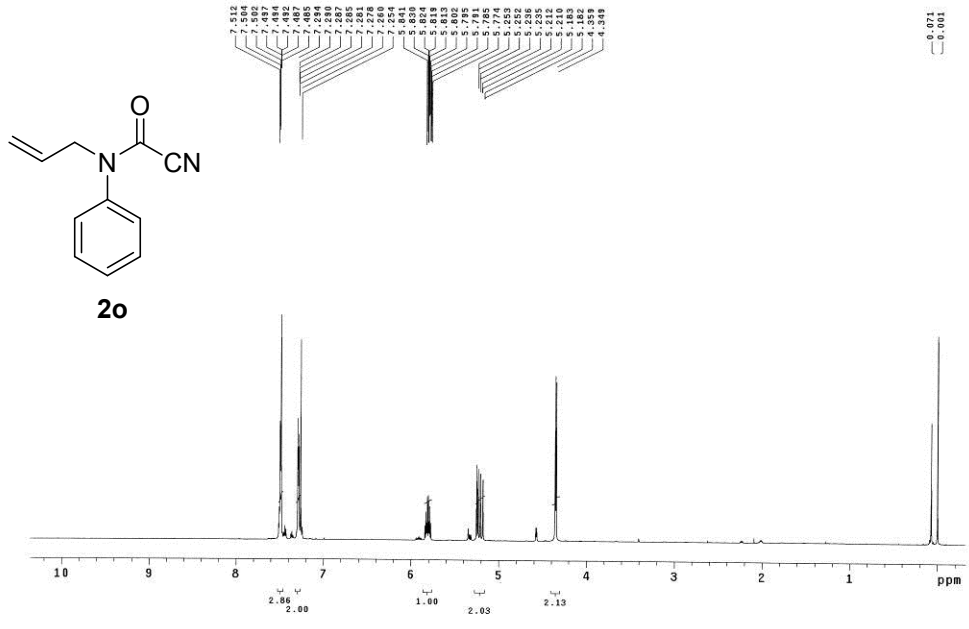

ZZ-130-CDCL3-C13-2015-7-1  
 Archive directory: /home/vmri/vmr/sys/data  
 Sample directory: OneProbe\_calib\_20140603\_05  
 Pulse Sequence: s2pu1

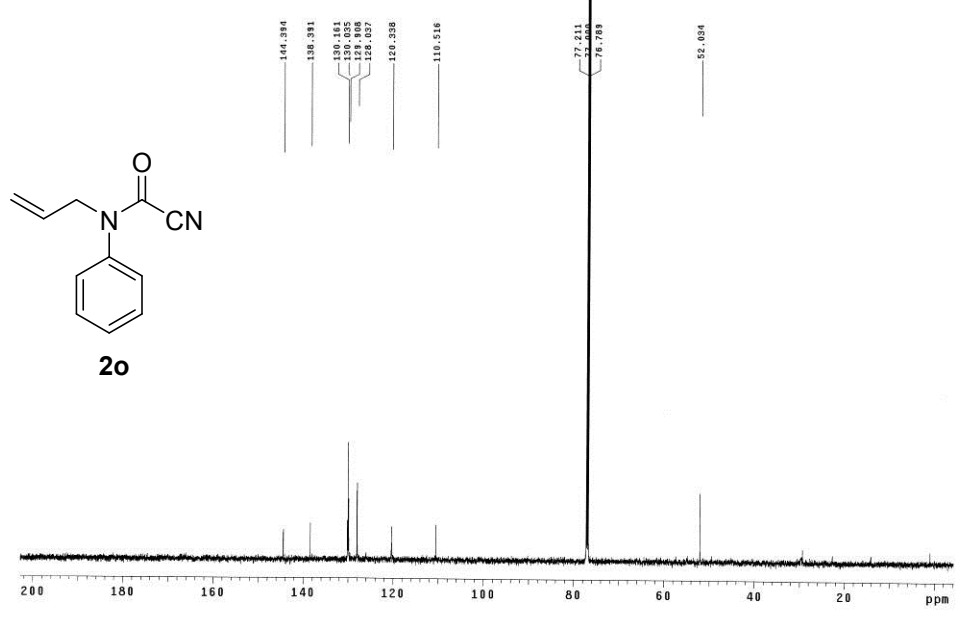

ZZ-12 H1 CDCl3 2015-6-29  
Archive directory: /home/vnmr1/vnmrsys/data  
Sample directory: OneProbe\_calib\_20140603\_05  
Pulse Sequence: s2pu1

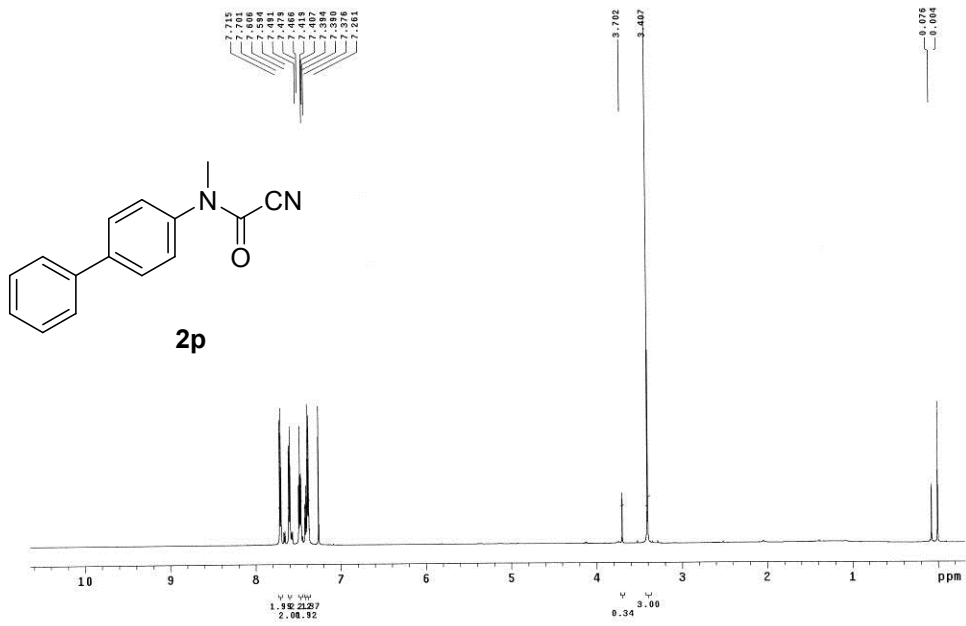

ZZ-120-CDCl3-C13-2015-7-1  
Archive directory: /home/vnmr1/vnmrsys/data  
Sample directory: OneProbe\_calib\_20140603\_05  
Pulse Sequence: s2pu1

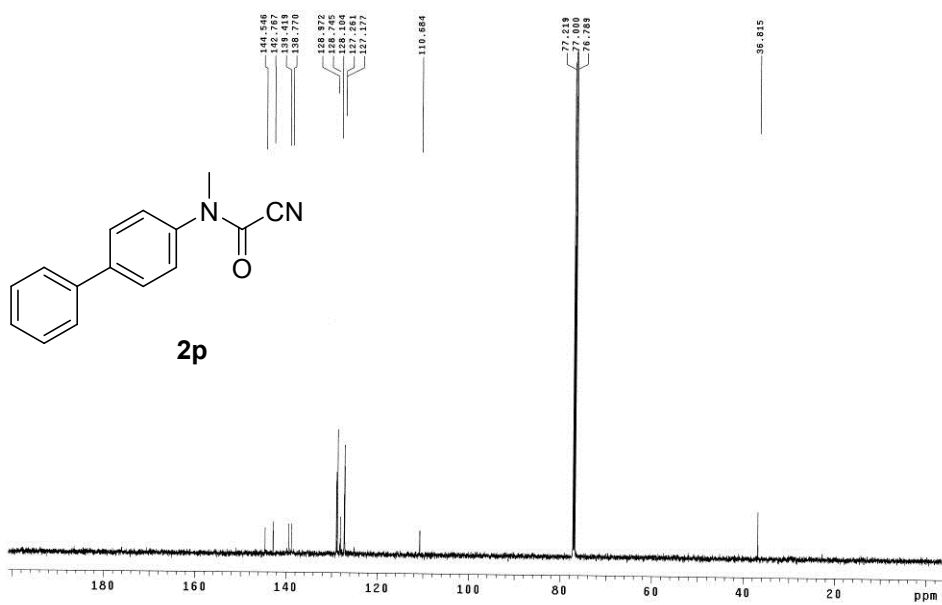

ZZ-15 H1 CDCl3 2015-6-28  
Archive directory: /home/vnmr1/vnmrsys/data  
Sample directory: OneProbe\_calib\_20140603\_05  
Pulse Sequence: s2pu1

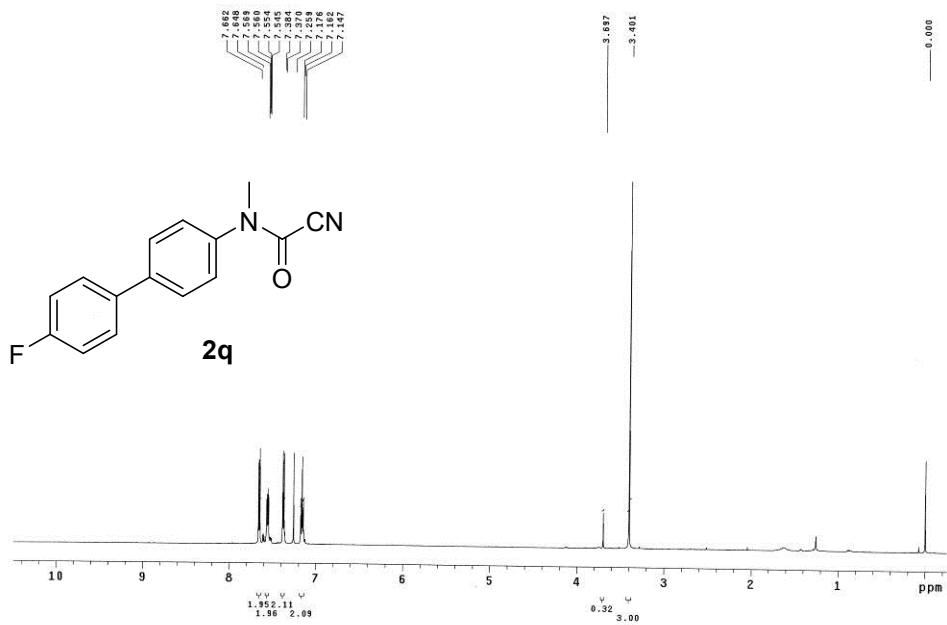

ZZ-150-CDCl3-C13-2015-7-1  
Archive directory: /home/vnmr1/vnmrsys/data  
Sample directory: OneProbe\_calib\_20140603\_05  
Pulse Sequence: s2pu1

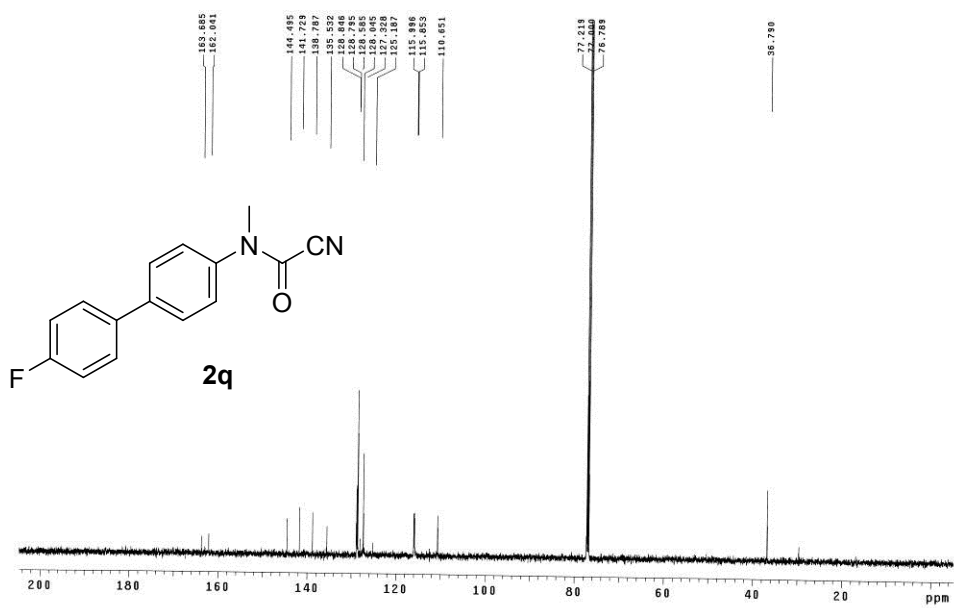

ZZ-23 H1 CDC13 2015-7-6  
Pulse Sequence: s2pu1

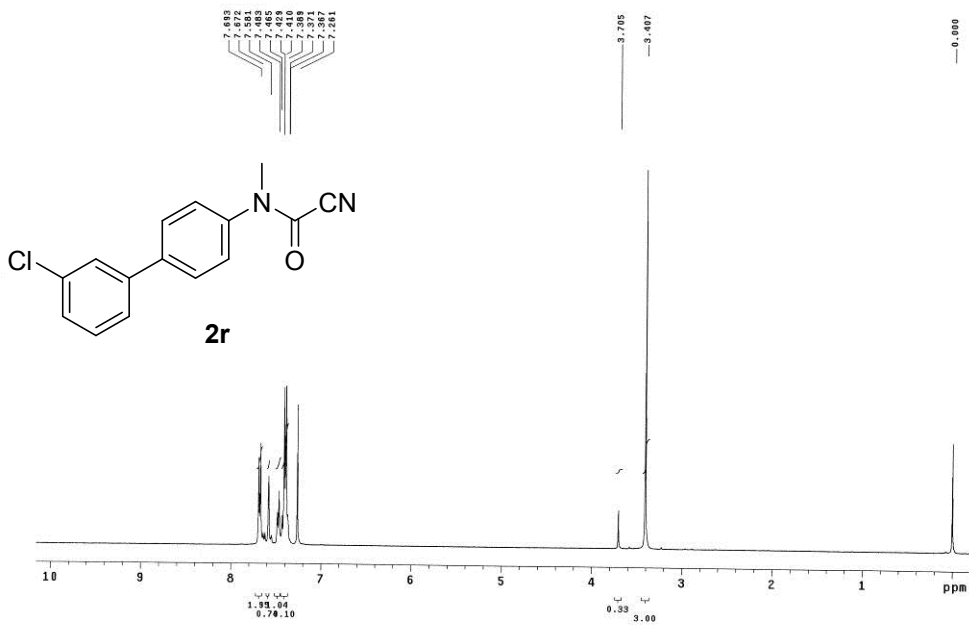

ZZ-230-CDCL3-C13-2015-7-8  
Archive directory: /home/vnmr1/vnmrSYS/data  
Sample directory: OneProbe\_calib\_20140603\_05  
Pulse Sequence: s2pu1

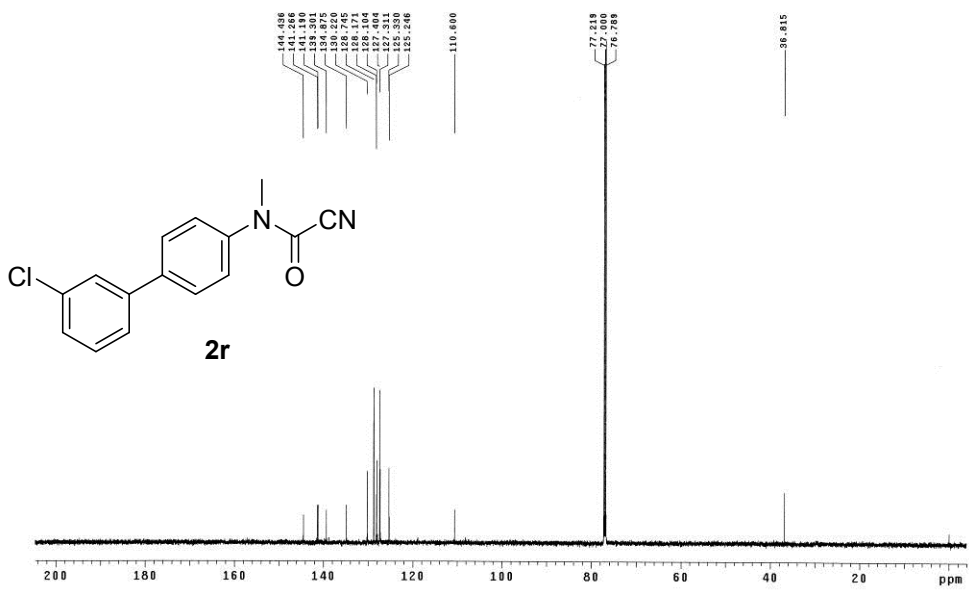

ZZ-24 H1 CDCl3 2015-7-7  
Pulse Sequence: s2pu1

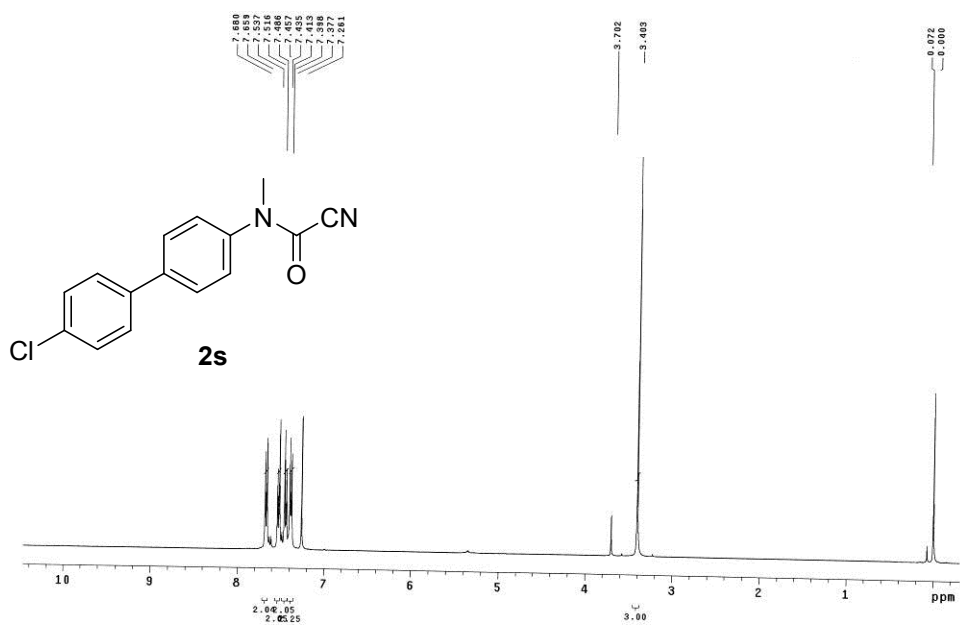

ZZ-240-CDCl3-C13-2015-7-11  
Archive directory: /home/vmmr1/vnmrsys/data  
Sample directory: OneProbe\_cat1b\_20140603\_05  
Pulse Sequence: s2pu1

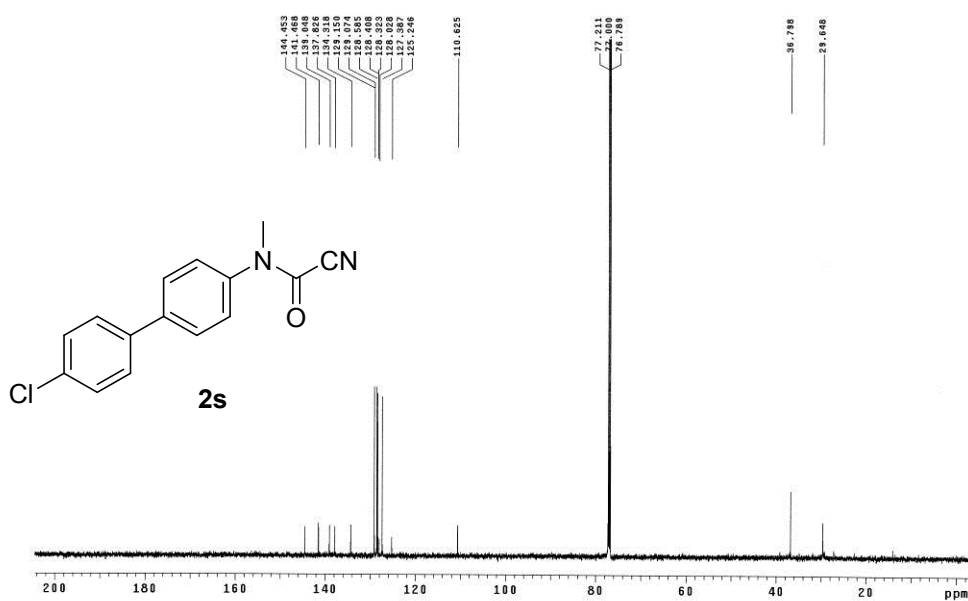

ZZ-14 H1 CDCl3 2015-6-29  
Archive directory: /home/vmr1/vmr/sys/data  
Sample directory: OneProbe\_callb\_20140603\_05  
Pulse Sequence: s2pu1

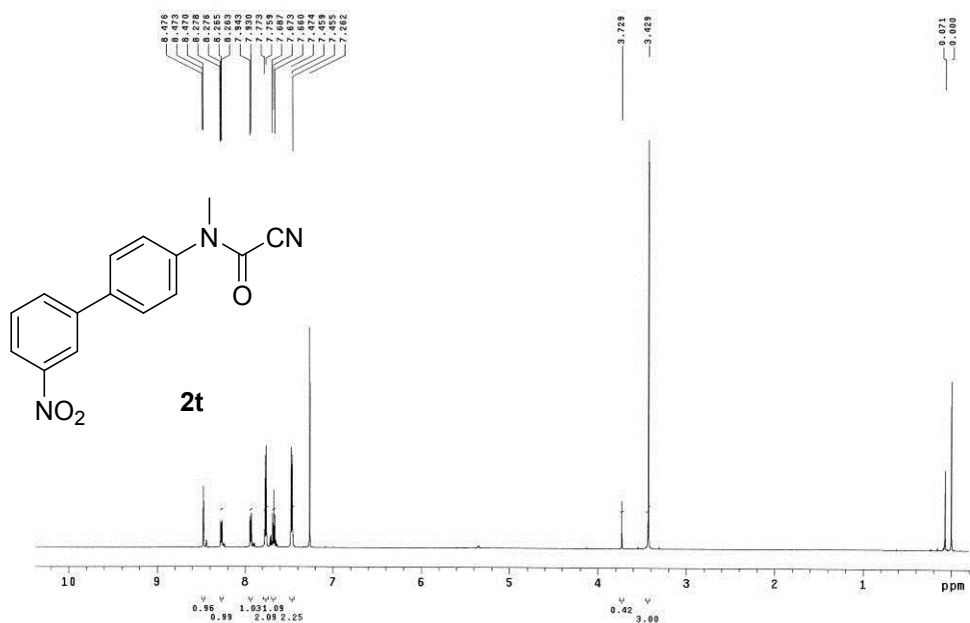

ZZ-140-CDCl3-C13-2015-7-1  
Archive directory: /home/vmr1/vmr/sys/data  
Sample directory: OneProbe\_callb\_20140603\_05  
Pulse Sequence: s2pu1

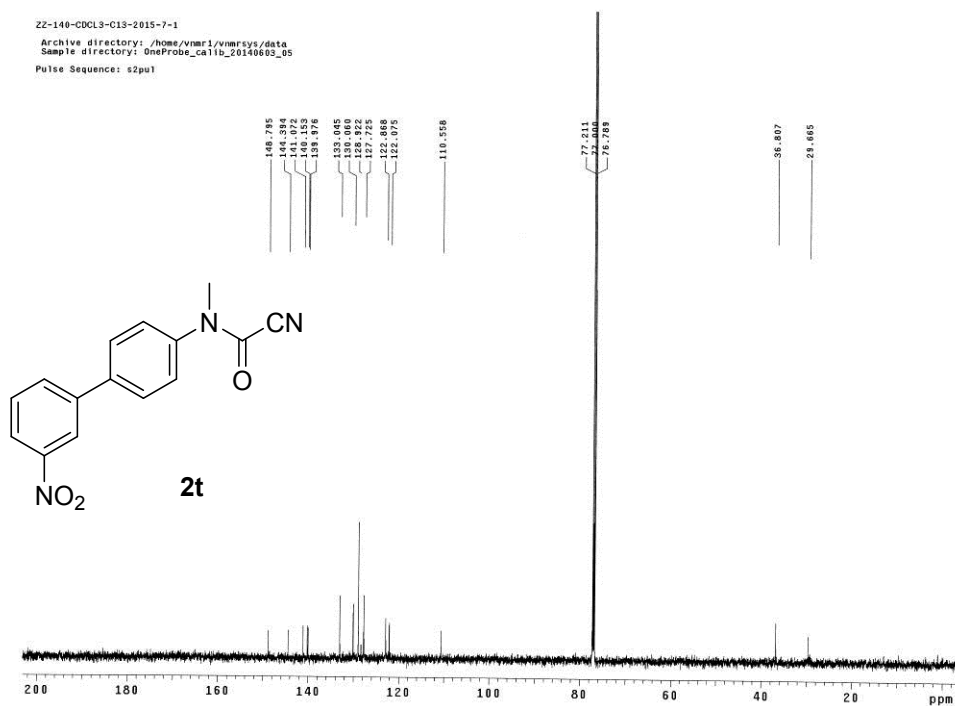

ZZ-26 H1 CDCl3 2015-7-8  
Pulse Sequence: s2pu1

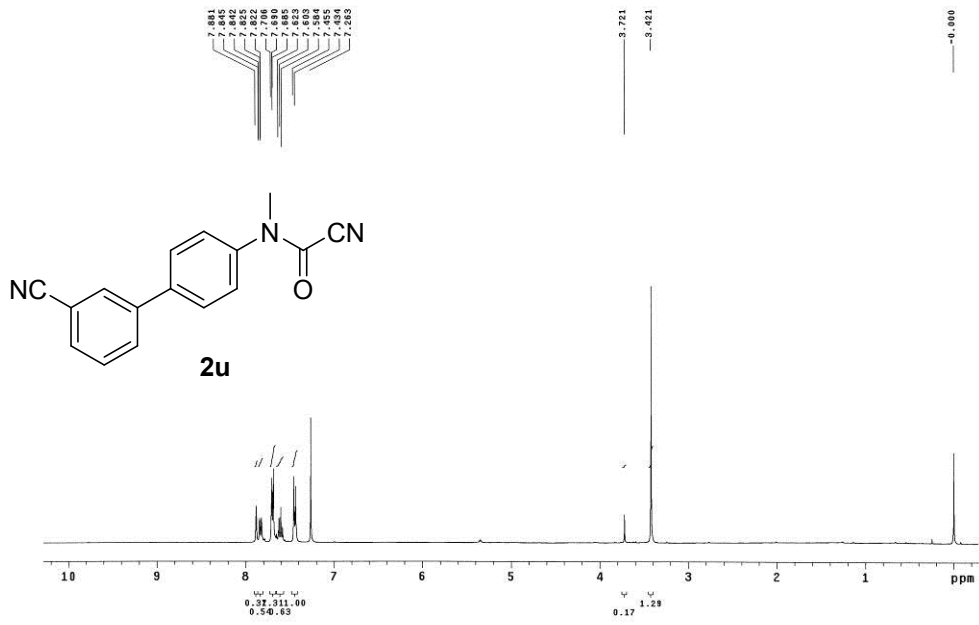

ZZ-266-CDCl3-C13-2015-7-11  
Archive directory: /home/vmr1/vmr/sys/data  
Sample directory: OneProbe\_calib\_20140603\_05  
Pulse Sequence: s2pu1

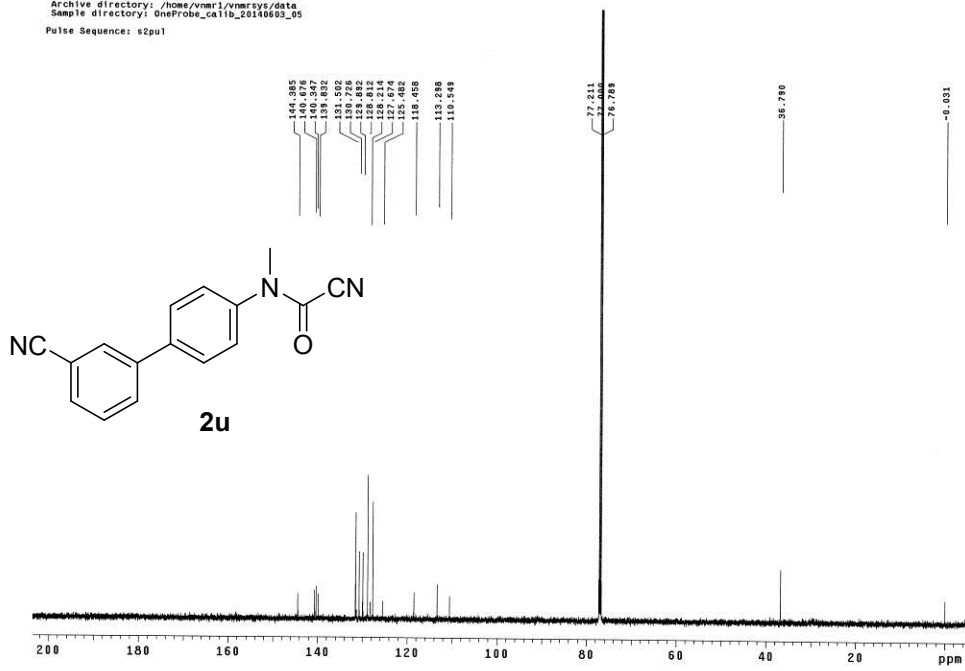



ZZ-22 H1 CDCl3 2015-7-6  
Pulse Sequence: s2pu1

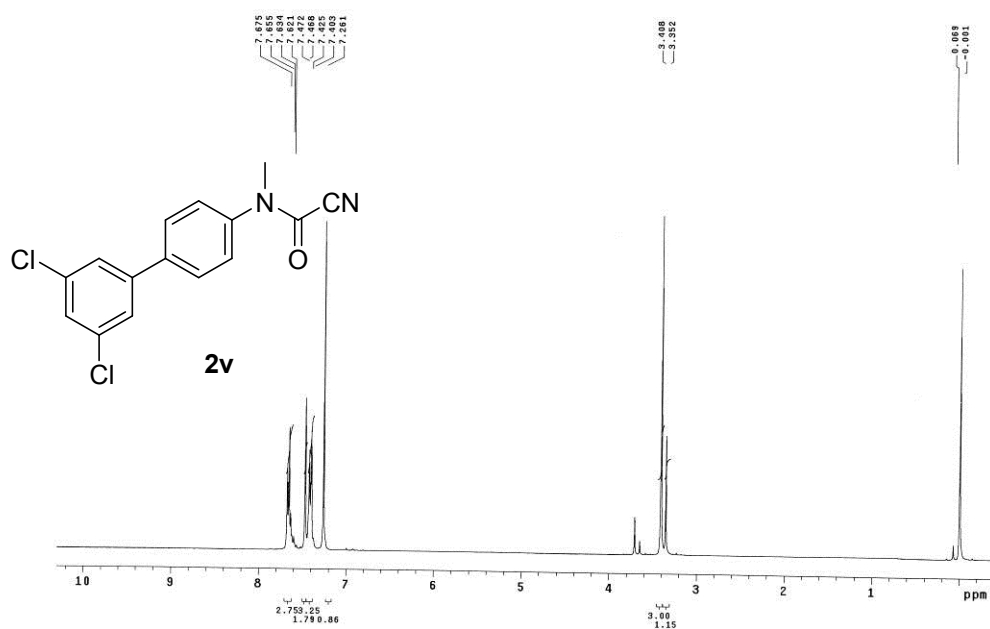

ZZ-220-CDCl3-C13-2015-7-8  
Archive directory: /home/vmr1/vmrsys/data  
Sample directory: OneProbe\_calib\_20146693\_05  
Pulse Sequence: s2pu1

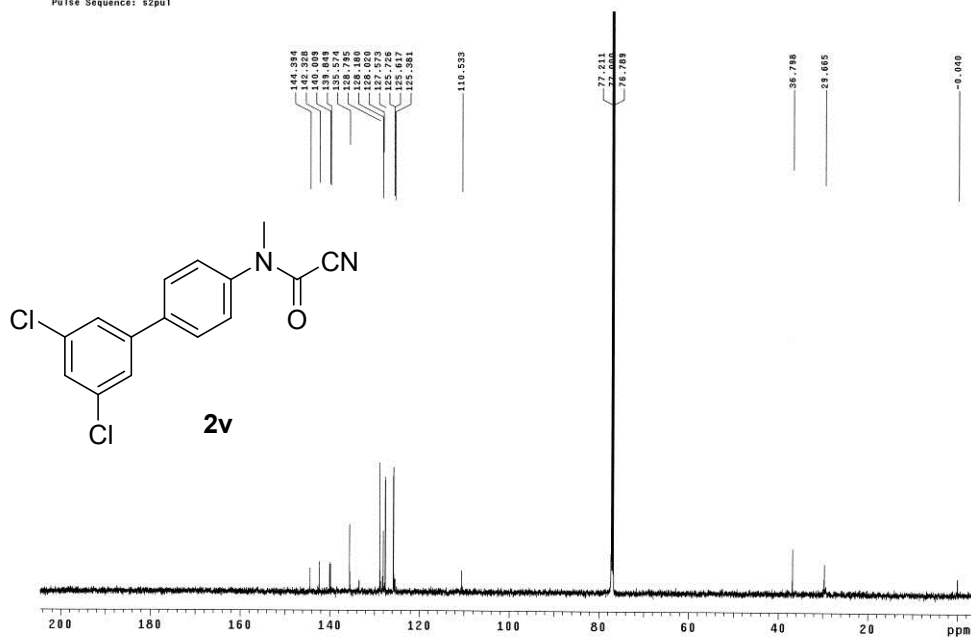

ZZ-27 H1 CDC13 2015-7-10  
Pulse Sequence: s2pu1

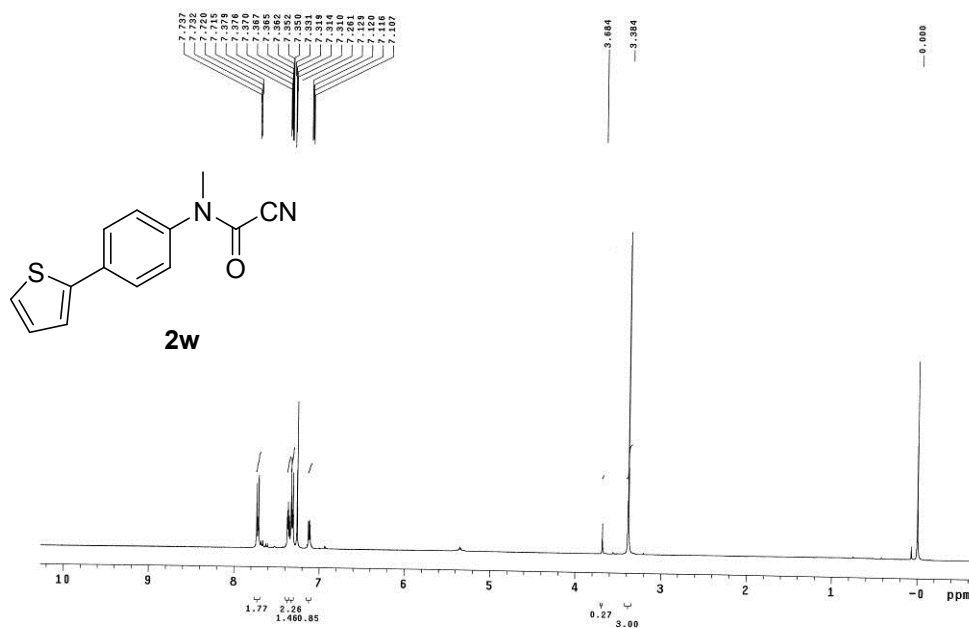

ZZ-270 C13 CDC13 2015-7-15  
Archive directory: /home/vmr1/vmr/sys/data  
Sample directory: OneProbe\_calib\_20150803\_05  
Pulse Sequence: s2pu1

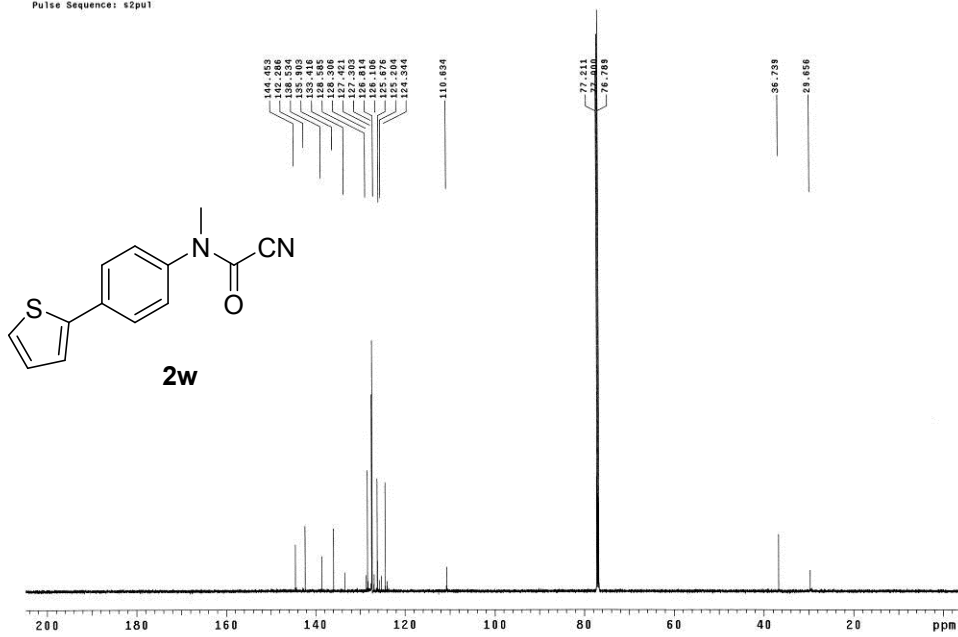

ZZ-93-CDCL3-H1-2015-8-19  
Pulse Sequence: s2pu1

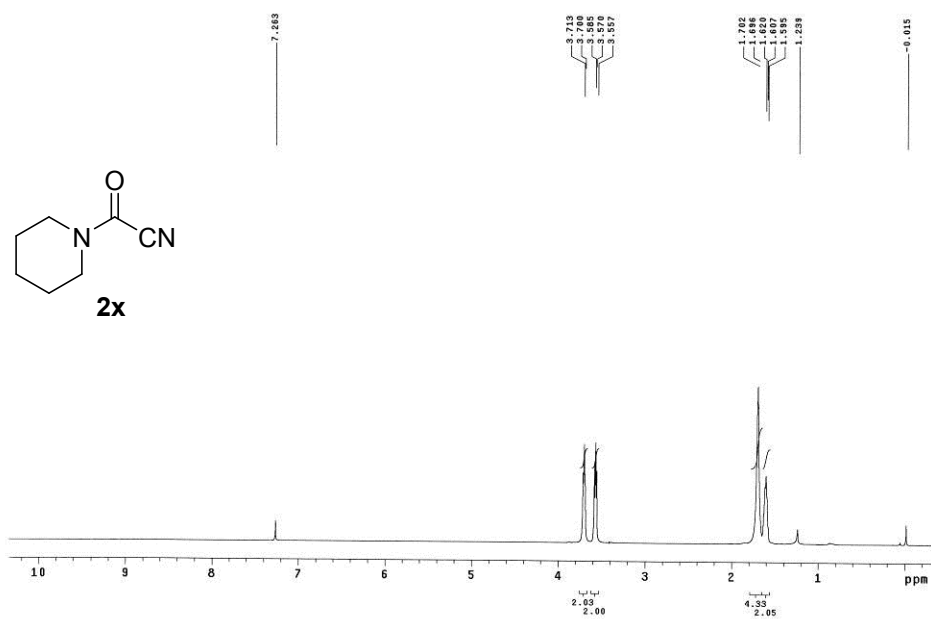

P03-03a H1 CDCl3 2015-5-24  
Archive directory: /home/vmr1/vmr/sys/data  
Sample directory: OneProbe\_calib\_20140603\_05  
Pulse Sequence: s2pu1

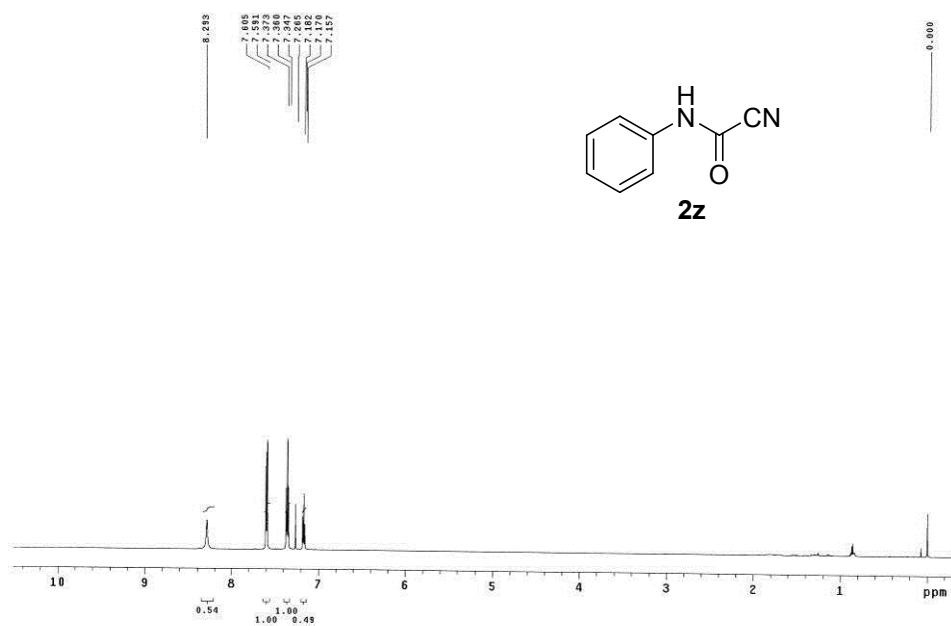

ZZ-43 H1 CDC13 2015-9-6  
Pulse Sequence: s2pu1

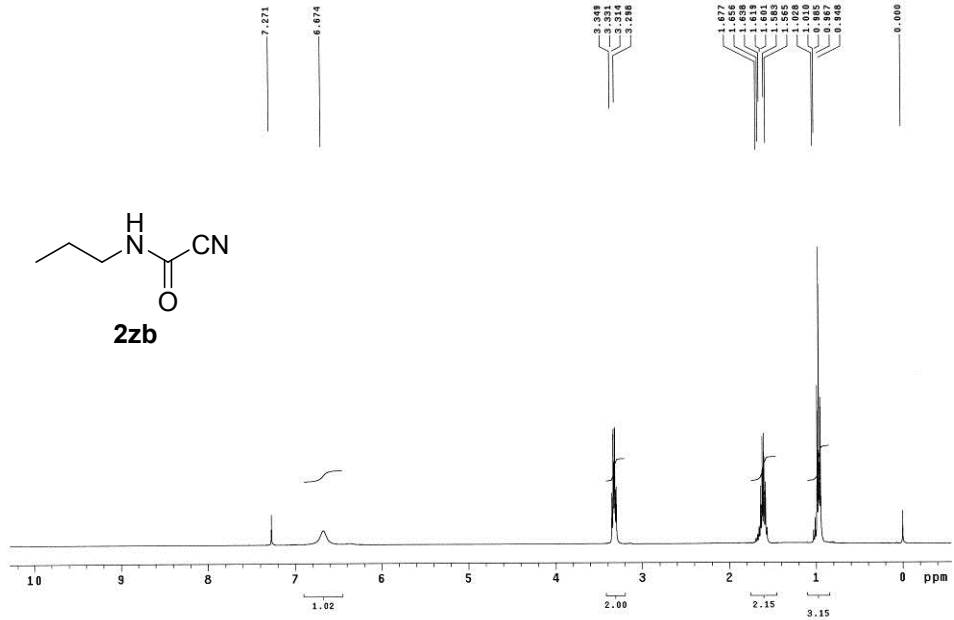

ZZ-44 H1 CDC13 2015-9-7  
Pulse Sequence: s2pu1

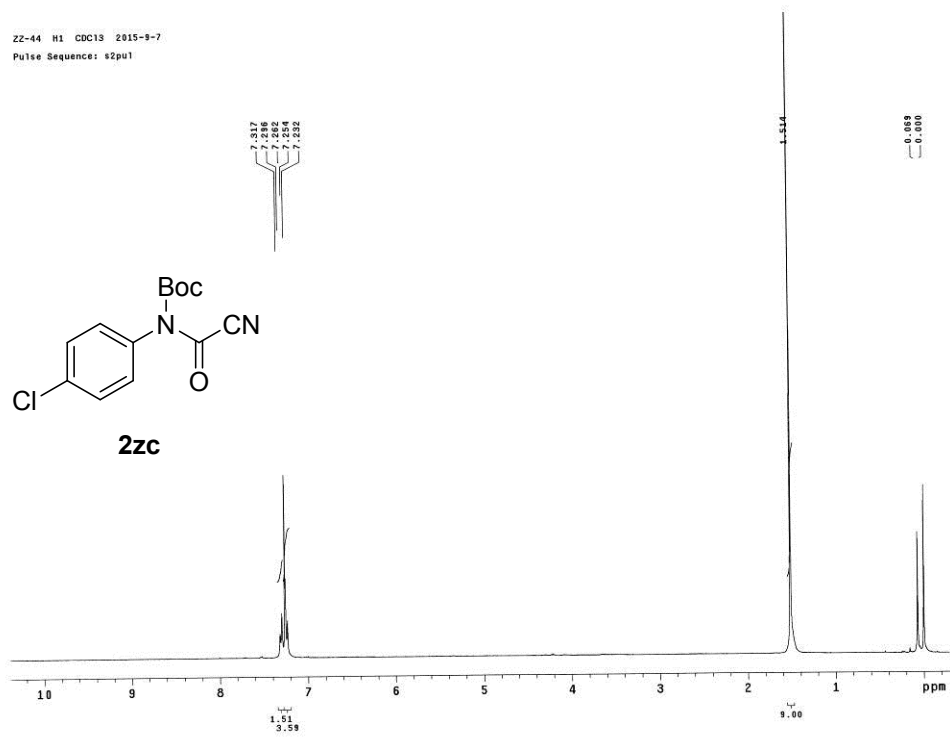

ZZ-45 H1 CDC13 2015-9-8  
Pulse Sequence: s2pu1

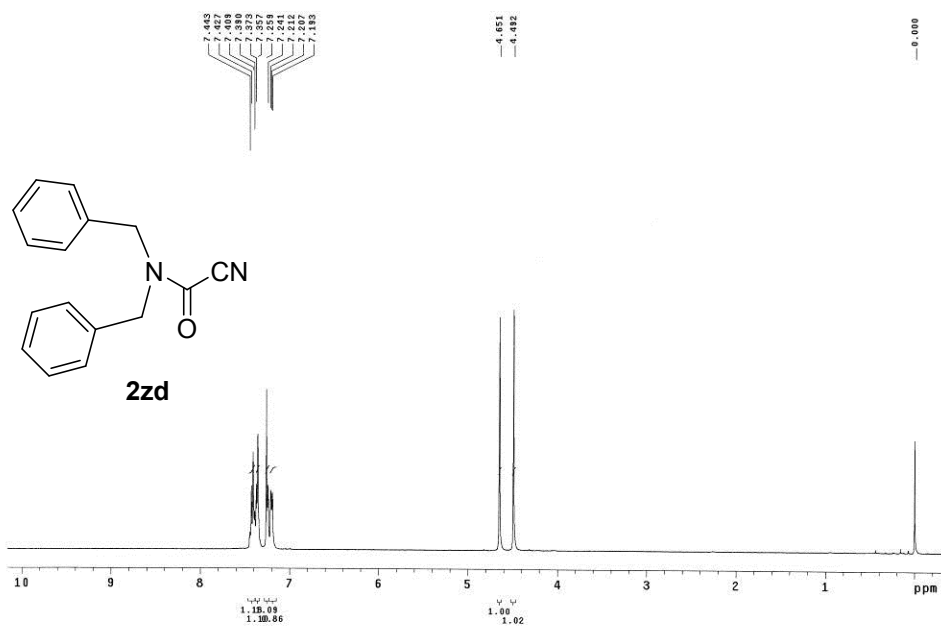

16:12:48  
150717\_ZZ\_240\_3\_4 (0.068) Cm(3:36)

17-Jul-2015  
TOF MS ES+  
1.09e4

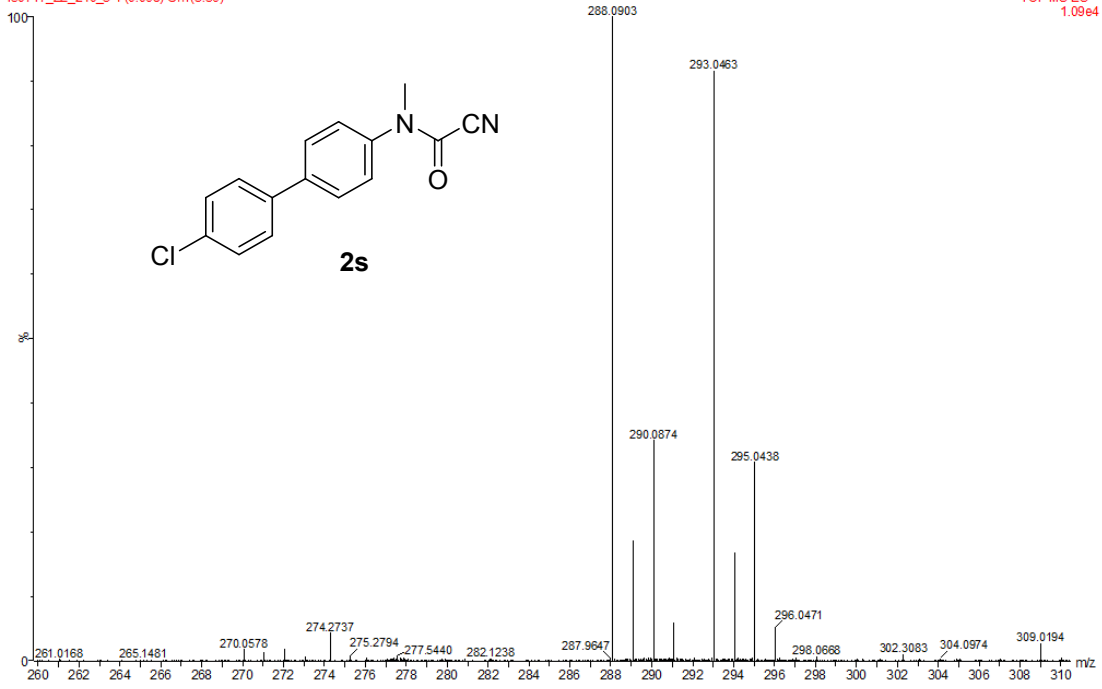

16:17:27  
150717\_ZZ\_260\_5\_7 (0.120) Cm(3:36)

17-Jul-2015  
TOF MS ES+  
4.19e4

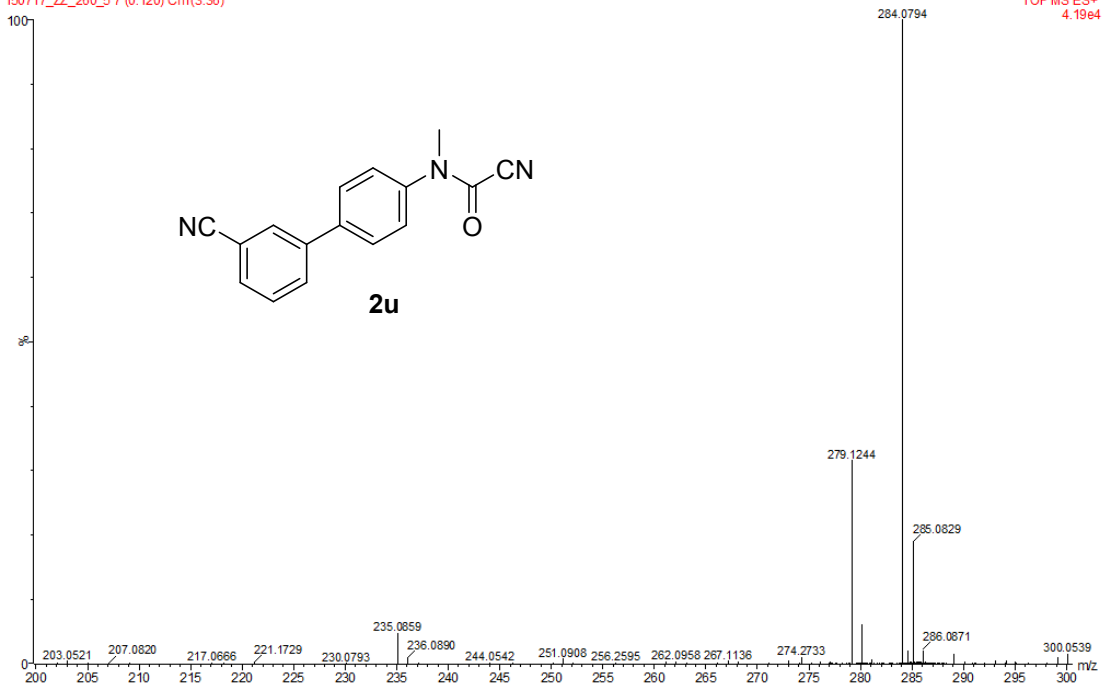

16:20:27  
150717\_ZZ\_270\_6\_7 (0.120) Cm (3:35)

17-Jul-2015  
TOF MS ES+  
5.21e3

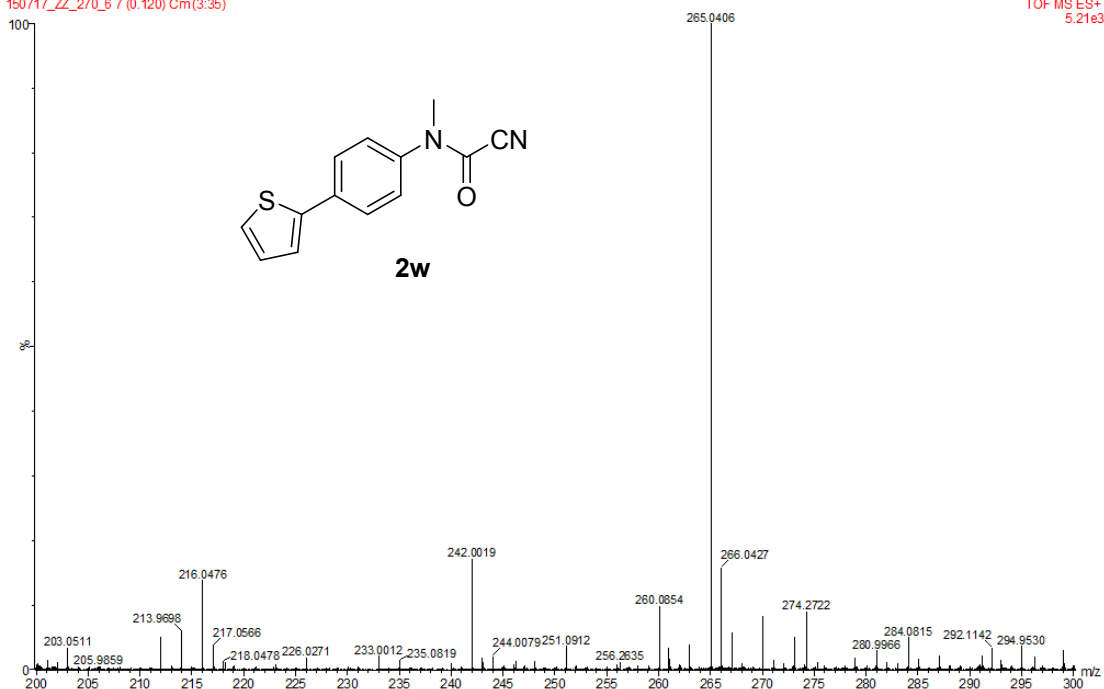

16:27:25  
150717\_ZZ\_250\_4\_9 (0.154) Cm (3:36)

17-Jul-2015  
TOF MS ES+  
7.52e3

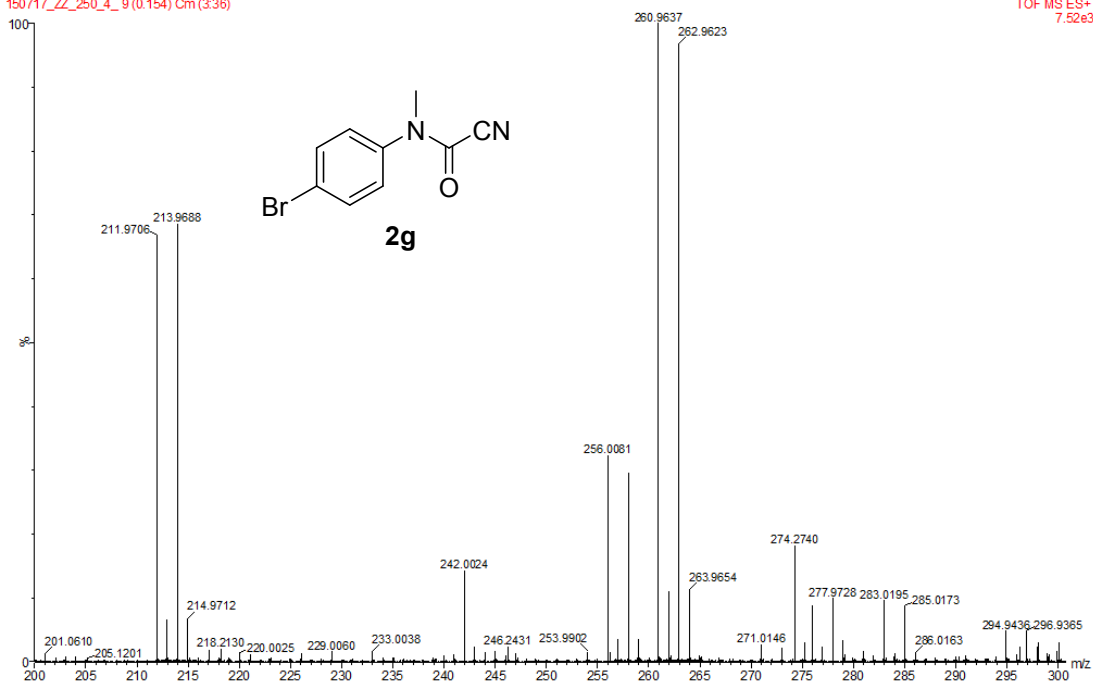

16:31:30  
150717\_ZZ\_160\_1 24 (0.410) Cm (3:36)

17-Jul-2015  
TOF MS ES+  
1.30e4

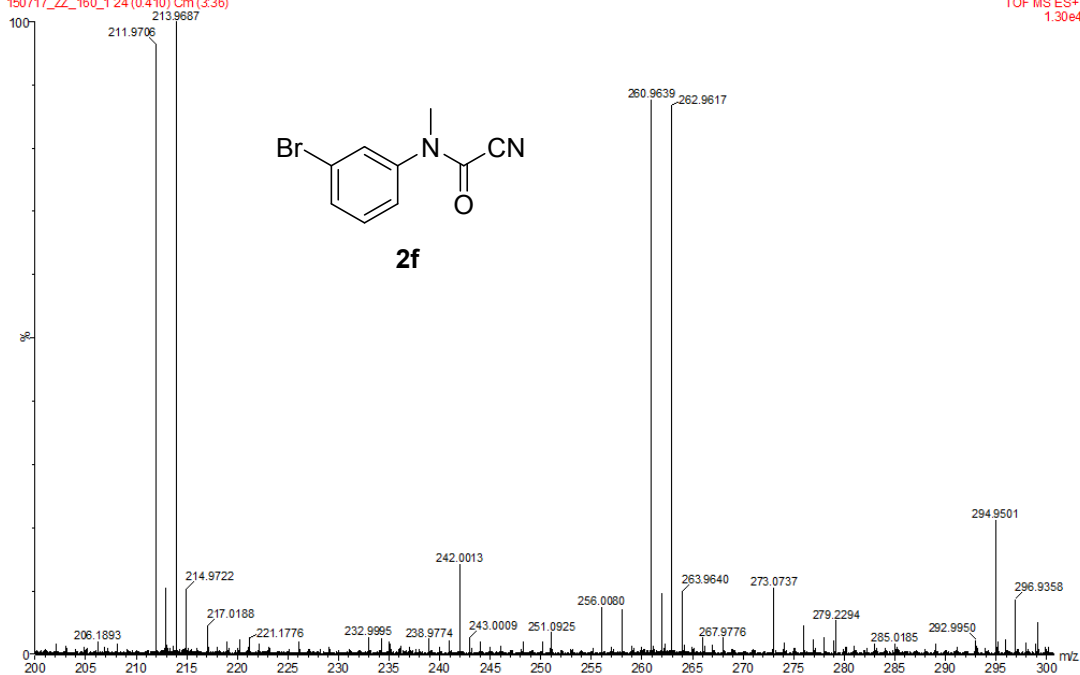

16:34:13  
150717\_ZZ\_190\_2 17 (0.291) Cm (2:35)

17-Jul-2015  
TOF MS ES+  
4.53e4

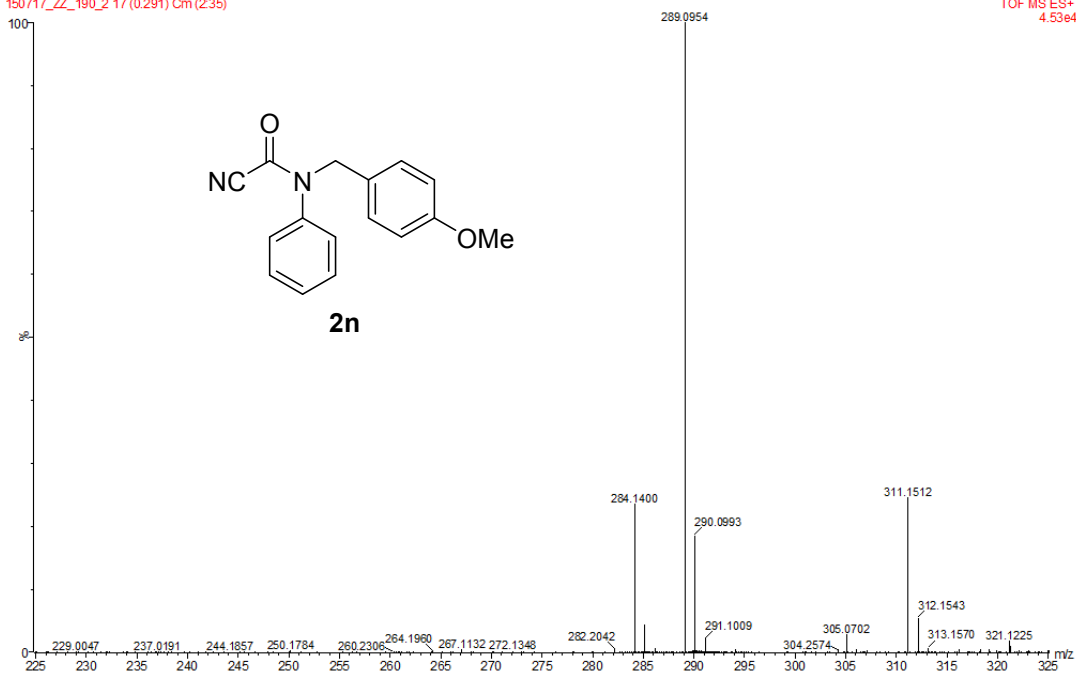

Supplement: c5ra14409d1.pdf [file c5ra14409d1.pdf]
